1 **Spatial proteomics reveals profound subcellular reorganization in human**  
2 **keratinocytes exposed to UVA light**

3 Hellen P. Valerio<sup>1\*</sup>, Felipe G. Ravagnani<sup>1</sup>, Angela P. Y. Candela<sup>1</sup>, Bruna D. C. da  
4 Costa<sup>1</sup>, Graziella E. Ronsein<sup>1\*</sup>, Paolo Di Mascio<sup>1\*</sup>

5 <sup>1</sup>Department of Biochemistry, Institute of Chemistry, University of São Paulo, São  
6 Paulo, 05508-000, Brazil

7 \*Correspondence: [hellen.valerio@usp.br](mailto:hellen.valerio@usp.br) (Hellen P. Valerio), [ronsein@iq.usp.br](mailto:ronsein@iq.usp.br)  
8 ([Graziella E. Ronsein](mailto:Graziella E. Ronsein)), [pdmascio@usp.br](mailto:pdmascio@usp.br) (Paolo Di Mascio)

9 **Summary**

10 The effects of UV light on the skin have been extensively investigated. However,  
11 systematic information about how exposure to UVA light, the least energetic but the  
12 most abundant UV radiation reaching the Earth, shapes the subcellular organization of  
13 proteins is lacking. Using subcellular fractionation, mass-spectrometry-based  
14 proteomics, machine learning algorithms, immunofluorescence, and functional assays,  
15 we mapped the subcellular reorganization of the proteome of human keratinocytes in  
16 response to UVA light. Our workflow quantified and assigned subcellular localization  
17 and redistribution patterns for over 3000 proteins, of which about 600 were found to  
18 redistribute upon UVA exposure. Reorganization of the proteome affected modulators  
19 of signaling pathways, cellular metabolism and DNA damage response. Strikingly,  
20 mitochondria were identified as the main target of UVA-induced stress. Further  
21 investigation demonstrated that UVA induces mitochondrial fragmentation, up-  
22 regulates redox-responsive proteins and attenuates respiratory rates. These observations  
23 emphasize the role of this radiation as a potent metabolic stressor in the skin.

## 24 **Introduction**

25 Ultraviolet-A (UVA) light (315–400 nm) constitutes about 95% of all ultraviolet  
26 radiation (UVR) that reaches the Earth<sup>1</sup>. The causal association between UVR exposure  
27 and skin cancer is well established, but epidemiology has little capacity to distinguish  
28 between the carcinogenic effects of UVA and UVB<sup>2</sup>. At the molecular level, the effects  
29 of UVA and UVB in skin cells are of different natures, suggesting that each wavelength  
30 range defines a different path towards malignant transformation<sup>3</sup>.

31 For example, UVB is absorbed by pyrimidines, giving rise to cyclobutane pyrimidine  
32 dimers (CPD) and pyrimidine (6-4) pyrimidone photoproducts. Thus, UVB's  
33 carcinogenic action depends on the direct generation of mutagenic DNA lesions<sup>1</sup>. On  
34 the other hand, UVA photons are poorly absorbed by the DNA, being more relevantly  
35 absorbed by other cellular chromophores<sup>4</sup>. In this sense, UVA relies on the generation  
36 of photoexcited species, such as singlet oxygen, that may lead to oxidative damage<sup>5</sup>.

37 Skin cells orchestrate complex responses to light stress, coordinating gene expression,  
38 metabolism and protein function<sup>6</sup>. Protein function is fine-tuned in a sophisticated  
39 manner, involving modulations in abundance, chemical modifications, and spatial and  
40 temporal delimitations<sup>7</sup>. Mutational dynamics is the primary driver of carcinogenesis.  
41 However, modulation of metabolism and protein function can contribute to this process  
42 by impacting signaling, organelle interactions and cell fate decisions towards apoptosis,  
43 senescence or malignant transformation<sup>2,8</sup>.

44 Even though the effects of UVR on DNA modification<sup>9</sup>, gene expression<sup>10</sup>, protein  
45 expression<sup>11</sup> and post-translational modifications<sup>12,13</sup> have been investigated,  
46 information about how specific UVR components shape the subcellular organization of  
47 proteins in cells is still lacking. Advances in high-throughput mass spectrometry<sup>14,15</sup> and  
48 microscopy<sup>7,16</sup> and machine learning applications for these techniques<sup>17,18</sup> allow  
49 proteome-wide investigations into subcellular localization dynamics and organellar  
50 communication in cells under stress. Spatial or organellar proteomics workflows may  
51 combine cell fractionation with mass spectrometry to characterize changes in protein  
52 levels in multiple subcellular niches<sup>17</sup>. Indeed, methods such as Protein Correlation  
53 Profiling (PCP)<sup>19,20</sup> and Hyperplexed Localisation of Organelle Proteins by Isotope  
54 Tagging (LOPIT)<sup>21,22</sup> and other organellar mapping approaches<sup>23,24</sup> have been  
55 developed to monitor protein dynamics over space in an unbiased manner.

56 The principle behind these methodologies is to quantify the distribution of proteins  
57 across subcellular fractions under different biological conditions. The fractionation  
58 profiles of proteins reflect the complexity of subcellular localization better than the  
59 presence or absence in a single purified fraction. Thus, they are used as an input for  
60 learning algorithms, allowing the prediction and classification of subcellular  
61 localization. Recently, machine learning pipelines predicted translocation events  
62 between subcellular niches by allowing the comparison of fractionation profiles under  
63 different biological conditions<sup>25</sup>.

64 In light of these advances, we used spatial proteomics coupled with machine learning  
65 techniques to systematically analyze the subcellular reorganization of the proteome of  
66 skin cells in response to UVA radiation. Our results show that a low UVA dose,  
67 equivalent to about 20 minutes of midday sun exposure<sup>26</sup>, leads to a profound spatial  
68 remodeling of the skin cells' proteome. We found that the spatial stress response relies  
69 on changes in mitochondrial dynamics, nucleocytoplasmic translocations triggered by  
70 DNA damage, and protein degradation. Furthermore, our results provide a resource for  
71 further investigations of UVA-triggered translocations.

## 72 **Results**

### 73 **Workflow used to investigate proteome remodeling of skin cells under UVA light** 74 **stress**

75 An overview of the experimental protocol is shown in **Fig. 1A**. In the experimental  
76 pipeline, HaCaT skin cells were exposed to a non-cytotoxic low dose of UVA light (6  
77 J/cm<sup>2</sup>, using a simulator of the solar UVA spectrum) or kept in the dark under the same  
78 environmental conditions. Mock-treated and UVA-exposed cells were collected, the  
79 plasma membranes were lysed in hypoosmotic solution, and the organelles were  
80 separated by differential centrifugation. Fractions were collected after each  
81 centrifugation step, and proteins were quantified in each fraction by conventional label-  
82 free mass spectrometry. A total of 5351 protein groups were identified and quantified in  
83 90 samples, comprising nine fractions for each of the five biological replicates of each  
84 condition. The dataset was filtered for proteins with label-free quantifications (LFQ) of  
85 greater than zero in at least one-third of all samples, yielding a matrix of 3287 protein  
86 groups. This step was performed to exclude proteins that were irregularly quantified  
87 across replicates and fractions.

88 Next, to assess if the dataset's structure reflected subcellular localization, we used three  
89 complementary approaches to inspect data quality, predict subcellular localization and  
90 infer protein translocation. First, we used t-SNE as a dimensionality reduction method  
91 overlaid with different databases (Uniprot, Gene Ontology and Cell Atlas) to inspect  
92 cluster formation. Second, we used a neural network algorithm to assess if subcellular  
93 localization could be predicted accurately by learning the fractionation patterns of  
94 organellar markers with well-established localization. Lastly, after validating the  
95 dataset's structure, we used the Translocation Analysis of Spatial Proteomics  
96 (TRANSPIRE) computational pipeline<sup>25</sup>, which is based on a gaussian process  
97 classifier, to investigate changes in the subcellular landscape induced by UVA light in  
98 human keratinocytes. An overview of the computational workflow is presented in **Fig.**  
99 **1B**. The results obtained by TRANSPIRE were further validated by conventional  
100 biochemical assays (**Fig. 1C**).

#### 101 **Validating the resolving power of the fractionation method**

102 Following our workflow, we first inspected the t-SNE plot generated from the filtered  
103 dataset to reduce dimensionality and detect the presence of clusters. The plot revealed  
104 the presence of four main clusters in distinct regions (**Fig. 1S**). When overlaid with the  
105 subcellular localization data from three different databases (Uniprot, Cell Atlas and  
106 Gene Ontology), we found that the four clusters represented four distinct subcellular  
107 environments: the nucleus, cytosol, mitochondria, and secretory organelles. The  
108 database classifications were binned such that secretory organelles included proteins  
109 from the ER, peroxisome, Golgi, lysosome and plasma membrane (**Fig. 1S**).

110 Since this analysis showed that the fractionation scheme provides the resolution  
111 necessary for differentiating these four main subcellular compartments, we curated  
112 organellar markers for each compartment to investigate if protein localization could be  
113 predicted based on the fractionation scheme. The Uniprot and Gene Ontology  
114 classifications of subcellular localization were used for curating the organellar markers.  
115 Thus, for a protein to be considered an organellar marker, it had to be classified in both  
116 databases as uniquely pertaining to one subcellular niche among the four compartments  
117 (i.e., cytosol, nucleus, mitochondria and secretory) established through dimensionality  
118 reduction. The fractionation profiles of uniquely localized proteins were then manually  
119 inspected to assure that the markers were reproducibly quantified and did not present  
120 missing values across replicates in our experiment.

121 Based on these criteria, 247 organellar markers were curated into four subcellular  
122 niches: the cytosol (64), nucleus (75), mitochondria (60), and secretory organelles (48).  
123 Fractionation profiles of markers from different compartments present characteristic  
124 shapes, demonstrating that proteins from the same subcellular niche tend to fractionate  
125 similarly (profile plots, **Fig. 2A**). The t-SNE supports the patterns observed in the  
126 profile plots, showing that organellar markers from different compartments cluster in  
127 separate plot regions, while markers of the same compartment cluster similarly (**Fig.**  
128 **2B**).

129 Following this analysis, a neural networks algorithm implemented in pRoloc<sup>27</sup>, utilizing  
130 as references of each compartment the fractionation profiles of curated organellar  
131 markers, classified proteins into four discrete subcellular compartments. To assess the  
132 reproducibility of prediction across replicates, we applied the algorithm to each of the  
133 five biological replicates of each condition separately. **Fig. 2C** contains the t-SNE plots  
134 representing the most frequent classification of each protein across the five replicates  
135 for each condition. All of the 3287 protein groups were classified into four subcellular  
136 niches: the cytosol ( $623 \pm 47$  proteins, considering the mean and standard deviation  
137 across replicates), nucleus ( $640 \pm 144$ ), mitochondria ( $1293 \pm 179$ ), and secretory  
138 organelles ( $707 \pm 183$ ), with slight differences for the total number of classifications  
139 between conditions (**Fig. 2D**). The cellular compartment classification obtained for each  
140 replicate was then compared to the GO classification. The results revealed that the  
141 neural networks algorithm achieved a mean prediction accuracy of 75% in control  
142 samples and 73% in treated samples (**Fig. 2E**). Classifications were also highly  
143 reproducible, with 80 and 85% of all proteins in the treated and control samples,  
144 respectively, receiving the same classification in at least 3 out of 5 biological replicates  
145 (**Fig. 2F**). All classifications obtained from the machine learning algorithm are  
146 accompanied by classification probability scores that reflect the reliability of the  
147 assignment. In this context, low scores are often associated with profiles not directly  
148 modeled by the organellar markers used in the algorithm (e.g., multilocalized  
149 proteins)<sup>24</sup>.

150 In addition, we analyzed if the dataset could provide sub-organellar resolution by  
151 overlaying the t-SNE plot with markers of sub-organellar compartments (obtained from  
152 Uniprot, Cell Atlas and Gene Ontology). The results indicate a partial divide between  
153 the mitochondrial matrix, membrane and nuclear subniches, such as the nucleolus,

154 nucleoplasm, and chromatin clusters (**Fig. 2G**). Moreover, the t-SNE plot also reveals  
155 that specific protein complexes colocalize *in vivo*. For example, our dataset's clustering  
156 of the heavy and light ribosome subunits and the proteasome supports the notion that  
157 the fractionation preserves the colocalization of interaction networks.

158 Altogether, these results indicate that the dataset is structured in a way that is dependent  
159 on subcellular localization, considering compartments delimited by membranes (i.e.,  
160 organelles) and compartments delimited by protein complex formation (i.e., the  
161 nucleolus and the proteasome). This analysis provides a comprehensive investigation of  
162 HaCaT subcellular architecture, allowing for inferences about UVA-induced  
163 translocations.

#### 164 **UVA light elicits extensive changes in the subcellular distribution of proteins**

165 Next, we used the recently developed TRASPIRE pipeline<sup>25</sup> to predict UVA-triggered  
166 translocation in the spatial proteomics dataset. This pipeline creates synthetic  
167 translocation classes from organellar markers, trains a Gaussian process classifier based  
168 on the synthetic translocation classes and predicts translocations in the actual dataset.  
169 The basis of this approach relies on first concatenating the organellar markers between  
170 the different biological conditions to produce synthetic markers. Then the synthetic  
171 markers are further clustered to provide different translocation and non-translocation  
172 classes, allowing the algorithm to predict the directionality of protein trafficking across  
173 subcellular niches.

174 The algorithm performs all possible combinations of organellar markers between  
175 conditions to generate synthetic translocations of different classes. In this sense,  
176 “Nucleus to Cytosol” and “Mitochondria to Mitochondria” would represent two  
177 different classes. Thus, the algorithm's output consists of the translocation classes  
178 attributed to each protein and translocation scores, calculated as described by Kennedy  
179 et al.<sup>25</sup>. False-positive rates (FPR) were calculated based on the learning model, and a  
180 0.5% FPR threshold was applied to define a true translocation event.

181 Importantly, changes in the fractionation profile may reflect diverse phenomena, such as  
182 translocation events<sup>23</sup>, altered organellar dynamics<sup>24</sup>, or possibly altered rates of  
183 synthesis and degradation of proteins within specific subcellular niches<sup>25</sup>. Learning  
184 algorithms applied to spatial proteomics present limitations in differentiating among  
185 these events since they only classify proteins according to translocation classes<sup>17,24</sup>.

186 As shown in **Fig. 3A**, the classifier achieved a high level of accuracy during training,  
187 reaching values above 90%, and identified 611 possible targets of translocation (FPR  
188 0.5%) altogether. The number of proteins assigned to each translocation class is shown  
189 in **Fig 3B**. By aligning the translocation classes in a circular plot (**Fig. 3C**), it is possible  
190 to see that they are not equally distributed across the four subcellular niches. Indeed the  
191 efflux is more intense for secretory organelles than for other compartments. This  
192 observation possibly reflects the crucial role secretory organelles play in protein  
193 trafficking between different subcellular niches. Translocating proteins are significantly  
194 enriched for biological processes related to cellular localization (“cellular localization”,  
195 “establishment of localization in cell”, “cellular component organization”) and  
196 mitochondrial translation (“mitochondrial translation elongation”, “mitochondrial  
197 translation termination”) (**Fig. 3D**). The GO terms for the cellular compartment indicate  
198 that translocating proteins are mainly cytosolic and mitochondrial, reinforcing the  
199 possible role of mitochondria in UVA-induced damage.

200 Further evaluation of the 12 highest scoring translocating proteins revealed that five  
201 (MAP2K3, PARP4, YTHDF2, OAS1, RNF114) were reported to be multilocalized  
202 according to the GO and Uniprot classifications (**Fig. 3E**). Previously, MAP2K3,  
203 RPS6KA4 and CLDN7 were reported to be UV-responsive<sup>28-31</sup>. Notably, MAP2K3, a  
204 protein responsible for activating the p38-MAPK signaling and one of the most  
205 significant pathways involved in the response against UV-induced stress in human cells,  
206 had the highest score<sup>32</sup>.

207 Considering that mitochondrial translocation and nucleocytoplasmic translocations were  
208 some of the most frequent types of events predicted by the algorithm and are  
209 unequivocally relevant to UVA’s biological action, we explored these processes in more  
210 depth, validating some translocation targets involved in the response of keratinocytes to  
211 DNA damage and UVA-induced metabolic stress.

### 212 **Spatial remodeling provides clues about UVA’s oxidative potential**

213 We first focused on curating the translocation labels predicted by the algorithm using  
214 GO classifications and a review of the literature to validate specific UVA-triggered  
215 translocations between the cytoplasm and nucleus. The algorithm identified a total of  
216 100 proteins that translocate between the cytosol and the nucleus, considering a 0.5%  
217 false-positive rate. The localization prediction of each protein in the control cells was

218 compared to the respective GO classification to achieve a more stringent list of  
219 translocation targets. We only kept proteins with concordant classifications for further  
220 analysis, which resulted in 67 out of the initial 100 proteins. Then, a literature review  
221 was performed to identify targets for which nucleocytoplasmic translocations had been  
222 previously identified, or at least for which dual nuclear-cytoplasmic localization and  
223 functions were previously reported. A total of 25 proteins fulfilled both conditions.  
224 These targets and their respective translocation scores are provided in the  
225 Supplementary Information.

226 The 25 protein targets play diverse biological roles. While some are transcription  
227 factors, others participate in nuclear cytoskeleton remodeling, signaling pathways and  
228 RNA processing. Nucleocytoplasmic translocations induced by DNA damage have been  
229 previously reported for UBL4A<sup>33</sup>, CETN2<sup>34,35</sup>, FAF1<sup>36</sup>, CTBP1<sup>37</sup>, RELA<sup>38</sup>, NFKB1<sup>38</sup>,  
230 CIAO2B<sup>39</sup> and CSNK2<sup>40</sup>. Moreover, three proteins (CIAO2B<sup>39</sup>, CETN2<sup>34</sup> and  
231 CSNK2<sup>41</sup>) have been shown to interact with nucleotide-excision repair (NER)  
232 components, which are involved in recognizing and repairing cyclobutane pyrimidine  
233 dimers (CPD) generated as a consequence of UVR exposure.

234 The  $\beta$  subunit of CSNK2 (CSNK2B), one of the strongest hits, was first implicated in  
235 the DNA damage response through its interaction with the tumor suppressor p53<sup>40</sup>.  
236 CSNK2 is also involved in the phosphorylation of two NER components (XPB,  
237 CETN2)<sup>42,43</sup>. Additionally, it has been demonstrated that XPC- and XPD-deficient cells  
238 expressing higher levels of CSNK2B are more resistant to UV-induced death<sup>44</sup>,  
239 especially since increases in CSNK2B lead to dramatic increases in CSNK2 activity<sup>45</sup>.  
240 In our experiment, CSNK2B shifts from a central position in the cytosolic cluster in  
241 controls to the interface between the cytosolic and nuclear clusters in irradiated samples  
242 (**Fig. 4A**). This behavior is consistent with a significant difference between groups  
243 observed for this protein in the profile plot, especially in the last fraction that is enriched  
244 with cytosolic proteins (**Fig. 4B**). Redistribution of CSNK2B from the cytoplasm to the  
245 nucleus upon irradiation was corroborated by immunofluorescence, indicating that  
246 UVA exposure leads to the translocation of cytosolic CSNK2B to the nucleus (**Fig. 4C**).  
247 To confirm that our irradiation conditions generated significant levels of DNA damage,  
248 we performed a modified version of the comet assay to detect different types of DNA  
249 lesions in cells following exposure to 6 J/cm<sup>2</sup> of UVA light (**Fig. 4D**). The comet assay  
250 was modified through the addition of formamidopyrimidine-DNA glycosylase (FPG),



251 endonuclease V (endoV) and endonuclease III (endoIII) to detect oxidized pyrimidines,  
252 CPD and oxidized purines, respectively. The predominant types of lesions generated  
253 immediately after exposure to UVA are CPD and oxidized purines, in agreement with  
254 what has been previously described for this radiation dose<sup>46</sup>. However, while oxidized  
255 purines seem to be efficiently removed from the DNA one hour after exposure to the  
256 radiation, CPD reaches a plateau and persists in HaCaT cells for at least four hours after  
257 irradiation. The DNA lesion profile identified here and its repair kinetics are consistent  
258 with NER activation, consequently triggering translocation events associated with this  
259 pathway. Even though UVA generates lower levels of CPD than UVB, CPD generation  
260 can still promote CSNK2B recruitment to the nucleus.

261 The algorithm also predicted the translocation of two NF- $\kappa$ B subunits (RELA and  
262 NFKB1). The RELA subunit contains the transactivation domain, responsible for the  
263 transcription factor function<sup>38</sup>, and we chose this subunit for further validation by  
264 confocal microscopy. In our translocation experiment, RELA of non-irradiated samples  
265 presents a typical cytosolic fractionation pattern, with peaks in the 6<sup>th</sup> and last fractions.  
266 However, upon irradiation, we observe a decrease in abundance in the 6<sup>th</sup> fraction and  
267 an increase in the 3<sup>rd</sup> fraction (**Fig. 5A**). Changes between conditions can also be  
268 observed in the t-SNE plots (**Fig. 5B**). Importantly, RELA is in the center of the  
269 cytoplasmic cluster in the control samples but shifts to the interface between the  
270 cytoplasmic and nuclear clusters following irradiation. To investigate NF- $\kappa$ B dynamics  
271 further, we immunolabeled the RELA subunit and performed immunofluorescence (IF)  
272 microscopy. Immunolabeling of the RELA subunit revealed a reduction in the overall  
273 levels of this transcription factor (**Fig. 5C**), which seems to be consistent with the  
274 attenuated abundance observed in the 6<sup>th</sup> fraction of irradiated cells. In control cells,  
275 RELA is present throughout the entire cytoplasm. However, in irradiated cells, RELA  
276 labeling weakens, assuming punctate structures and possibly reflecting the cellular  
277 compartmentalization of protein degradation. Previous studies addressing functional  
278 aspects of NF- $\kappa$ B in HaCaT cells exposed to UVA light revealed contradictory roles for  
279 this protein in this type of stress response<sup>47-49</sup>. It was reported that UVA doses lower  
280 than 1 J/cm<sup>2</sup> induce NF- $\kappa$ B activation, while higher doses lead to decreased NF- $\kappa$ B  
281 levels<sup>50</sup>. Moreover, in agreement with our results, UVA light has been previously  
282 described to induce NF- $\kappa$ B degradation in human keratinocytes<sup>47</sup>. In this context,  
283 deuterated water enhanced UVA-induced NF- $\kappa$ B degradation and low concentrations of

284 sodium azide abolished this effect. Importantly, since deuterated water prolongs the  
285 half-life of singlet oxygen and sodium azide is a singlet oxygen quencher, UVA-  
286 induced NF- $\kappa$ B degradation has been mainly attributed to singlet oxygen generation.

### 287 **UVA light promotes metabolic stress through mitochondrial fragmentation**

288 Since mitochondrial proteins have been detected as the significant pool of translocating  
289 targets, we investigated and validated the role of the spatial reorganization of  
290 mitochondrial components in the response against UVA-induced stress. Interestingly,  
291 most of the mitochondrial proteins classified as translocating are structural and uniquely  
292 localized to the mitochondria. These proteins are not usually involved in translocations  
293 across different subcellular niches. Examples include mitoribosomal subunits and  
294 electron transport chain components (**Fig. 6A**). We hypothesized that alterations in the  
295 fractionation profiling of these proteins between conditions might represent alterations  
296 in mitochondrial morphology and not necessarily translocations. Thus, we  
297 immunolabeled a respiratory chain component (COX4I1) and performed an IF  
298 experiment. As shown in **Fig. 6B**, in controls, COX4I1 displays the typical tubular  
299 appearance of the mitochondrial network and forms punctate structures in irradiated  
300 samples, a sign of UVA-induced mitochondrial fragmentation.

301 Besides detecting changes in the fractionation profile of structural mitochondrial  
302 proteins, our algorithm also detected the movement of some proteins that have been  
303 previously described as migrating from the mitochondria to the nucleus. Thus, to  
304 determine if changes in the fractionation profiling of non-structural mitochondrial  
305 proteins predicted as translocations also reflect mitochondria fragmentation, we  
306 validated the spatial redistribution of fumarase (FH) and ornithine aminotransferase  
307 (OAT) in irradiated cells. Notably, both FH and OAT have been reported to translocate  
308 from the mitochondria to the nucleus<sup>51,52</sup>. We also monitored PDHA1 in the same  
309 experiment to check for colocalization of structural and non-structural mitochondrial  
310 proteins. The results showed that both FH and OAT display similar migration patterns  
311 in the t-SNE, shifting from the interface between the mitochondrial and nuclear clusters  
312 in control cells to the interface between the mitochondrial and cytosolic clusters in  
313 treated cells (**Fig. 7A-B**). Thus, both proteins display decreasing levels in the first  
314 fractions (1-3) of irradiated samples compared to control samples, accompanied by  
315 increased levels in the last fraction (**Fig. 7C-D**). Immunofluorescence images confirmed  
316 the same mitochondrial fragmentation phenomenon observed for labeling structural

317 mitochondrial proteins (COX4I1 and PDHA1), reinforcing our previous results (**Fig.**  
318 **7E-F**).

319 Since cells displaying fragmented mitochondria usually have a reduced respiratory  
320 capacity<sup>53</sup>, we measured oxygen consumption rates in HaCaT cells exposed to UVA  
321 light using a Seahorse Analyzer XF24 to validate the functional impact of mitochondrial  
322 fragmentation. Accordingly, basal and maximal mitochondrial respiration are decreased  
323 in irradiated cells compared to control samples, supporting the notion of electron  
324 transport chain dysfunction (**Fig. 8A**). Changes in mitochondrial respiration were  
325 accompanied by a decrease in the cell's reductive power up to 24 hours after irradiation,  
326 without losses in viability, as inferred by the MTT results and the trypan blue exclusion  
327 assay (**Fig. 2S**). The reduction in the cell's reductive power occurs in a radiation dose-  
328 dependent manner. Importantly, we did not observe leakage of cytochrome *c* from the  
329 mitochondria to the cytosol or BAX translocation, as would be expected of cells  
330 entering apoptosis (**Fig. 2S**). We also searched for changes in the fractionation profiles  
331 of MFN1 and MFN2, two key regulators of mitochondrial dynamics, to further confirm  
332 mitochondrial fragmentation. Indeed, as shown in **Fig. 8B**, both proteins displayed  
333 differential fractionation profiles between biological conditions.

334 Since UVA light is known to cause oxidative and genotoxic stresses<sup>1</sup> and help explain  
335 the changes in mitochondrial dynamics, we tested if a low dose of UVA could promote  
336 alterations in the levels of stress-responsive proteins one and a half hours after radiation  
337 exposure. After this period, 138 proteins were significantly modulated between groups  
338 (**Fig. 8C**). Focusing on stress-responsive proteins (**Fig. 8C**), we observed the up-  
339 regulation of DNA damage response components (RAD23B and XRCC6), a few DNA  
340 replication licensing factors, antioxidant enzymes (GSTP1 and PRDX1) and heat shock  
341 proteins. Additionally, a few subunits of the electron transport chain complexes and a  
342 few redox-responsive proteins (CAT and PRDX3) were down-regulated.

343 By analyzing the fold change of proteins between treatments in a compartment-specific  
344 fashion (**Fig. 8D**), we found that the fold change of mitochondrial proteins is  
345 significantly lower when compared to the whole proteome ( $p = 1.47 \times 10^{-17}$ , Wilcox  
346 test, FDR correction), suggesting that decreasing levels of electron transport chain  
347 components recapitulate mitochondrial proteome changes as a whole. Importantly,  
348 mitochondrial fragmentation usually facilitates mitophagy of damaged mitochondria<sup>54</sup>.

349 These results show that exposing skin cells to UVA light impacts mitochondrial  
350 dynamics, leading to fragmentation, respiratory dysfunction, and the upregulation of  
351 stress response proteins.

## 352 **Discussion**

353 The present study is the first to provide a map of subcellular protein reorganization  
354 induced by the UVA component of sunlight in a skin cell type. High sensitivity MS-  
355 based proteomics coupled to machine learning algorithms quantified and assigned  
356 subcellular localization and redistribution patterns for over 3000 proteins in human  
357 keratinocytes exposed to UVA light. Our unbiased approach revealed that a single low  
358 dose of UVA light could affect the proteomic architecture of skin cells, provoking the  
359 reorganization of subcellular structures due to genotoxic and metabolic stresses.

360 In this work, about 20% of the identified and quantified proteins (over 600 proteins  
361 from a total of 3200) relocated in response to UVA exposure. Our results showed that  
362 redistribution of proteins across subcellular niches encompass different phenomena,  
363 such as changes in organelle dynamics, translocation and targeting for degradation.  
364 After considering all redistribution events, important modulators of cellular metabolism,  
365 mitochondrial function, protein and vesicle trafficking, signaling pathways and DNA  
366 damage recognition and repair were identified.

367 Previously it was reported that DNA damage response rewires metabolic circuits, fine-  
368 tuning protein synthesis, trafficking and secretion<sup>55</sup>. However, it is not clear how  
369 genotoxic components of the sunlight affect protein localization or organelle  
370 architecture and interactions. We showed that UVA exposure caused nucleocytoplasmic  
371 translocations induced by DNA damage. For instance, our algorithm detected with high  
372 confidence the nucleocytoplasmic translocation of CSNK2B in UVA-irradiated cells, a  
373 finding further confirmed by confocal microscopy. CSNK2 has many biological targets,  
374 maintaining cellular viability and the DNA damage response<sup>41,56,57</sup>. Its role in the  
375 cellular response against UVR has been described in terms of its interaction with p53  
376 and NER components<sup>41</sup>. Indeed, using the Comet assay, we observed that UVA  
377 radiation leads to simultaneous CPD formation and CSNK2B translocation. We also  
378 monitored DNA damage over time and observed that CPDs are repaired over 24 hours,  
379 indicating NER activation. Collectively, these results demonstrate that UVA triggers a

380 classical DNA damage signaling pathway, even though it generates lower levels of CPD  
381 than the more energetic UVB light.

382 Besides having oxidative effects on the DNA, we also provide evidence that UVA can  
383 target NF- $\kappa$ B's catalytic subunit for degradation, which likely occurs in a singlet  
384 oxygen-dependent manner, as previously proposed<sup>47</sup>. Since NF- $\kappa$ B is ubiquitously  
385 distributed across the cytoplasm, the extensive degradation of this protein indicates that  
386 the oxidative potential of UVA may bear consequences for the entire surface of cells.  
387 Importantly, this evidence also reinforces the differential immunomodulatory effects of  
388 UVA and UVB on the skin<sup>26</sup> since UVB has been extensively reported to trigger NF-  
389  $\kappa$ B's nuclear translocation and subsequent activation of this transcription factor<sup>58</sup>. In  
390 contrast, UVA seems to trigger the opposite effect.

391 The most striking result of our systematic proteomic profiling was identifying  
392 mitochondria as the main target of UVA-induced stress. We showed that UVA induces  
393 mitochondrial fragmentation, up-regulates redox-responsive proteins and reduces the  
394 respiratory rate, leading to changes in the cells' overall energetic status. These results  
395 expand on previous characterizations of mitochondrial dysfunction in response to UV  
396 radiation<sup>59,60</sup> and show that alterations occur even with acute low-dose exposures to  
397 UVA, the least energetic component of the UV spectrum. It has been suggested that  
398 UVA-induced deletions in mtDNA underlie the long-term effects of UVA during  
399 photoaging<sup>61</sup>. However, our results suggest that UVA also has short-term effects on the  
400 mitochondria, acting as a potent stressor immediately after exposure. Some endogenous  
401 metabolites have been proposed to play a role in UVA's photosensitization in skin cells,  
402 such as flavin-derivatives, NADH, NADPH, FADH, urocanic acid, porphyrins and  
403 some sterols<sup>5</sup>. Mitochondria, in particular, contain high concentrations of putative UVA  
404 chromophores, such as flavin-derivatives, NADH, FADH and NADPH, which could  
405 mediate the damage to this organelle.

406 Several studies showed that high doses of UVB irradiation (e.g., > 100 mJ/cm<sup>2</sup>) trigger  
407 mitochondrial fragmentation in keratinocytes<sup>60,62,63</sup>. On the other hand, UVC (60  
408 mJ/cm<sup>2</sup>) leads to mitochondrial hyperfusion instead of fragmentation in mouse  
409 fibroblasts, suggesting that UVR-induced modulations of mitochondrial dynamics are  
410 complex and context-dependent<sup>64</sup>. Our results show that even low doses of less  
411 energetic UVA light induce mitochondrial fragmentation.

412 UVB-induced mitochondrial fragmentation is dependent on DRP1 mitochondrial  
413 translocation, with partial roles for MFN1 and OPA1<sup>60</sup>, frequently followed by  
414 apoptosis<sup>62,63</sup>. In our experiments with UVA irradiation, we did not detect changes in  
415 molecular markers of apoptosis, such as cytochrome *c* leakage from mitochondria, BAX  
416 translocation, or attenuated cell viability. Moreover, we did not observe changes in the  
417 abundance or subcellular reorganization of DRP1 or OPA1. However, we did observe  
418 that MFN1 and MFN2 displayed a differential fractionation profile between conditions,  
419 suggesting that UVA may affect their function differently than other UV wavelength  
420 ranges. Importantly, MFN1 and MFN2 modulations have been reported to occur in  
421 response to oxidative stress<sup>65</sup>. For example, fibroblasts exposed to exogenous H<sub>2</sub>O<sub>2</sub> up-  
422 regulate the ubiquitination of MFN1 and MFN2, triggering mitochondrial  
423 fragmentation<sup>66</sup>.

424 Our study has several strengths. First, machine learning predictions involving DNA  
425 damage response, inflammation and cellular metabolism were validated using confocal  
426 microscopy and functional assays. Second, our dataset opens up possibilities for further  
427 investigation of UVA-triggered translocation events in less studied subcellular niches.  
428 Furthermore, ER and Golgi vesiculation occur in UV-exposed cells<sup>55</sup>, and our data  
429 suggest that proteins from these compartments are redistributed upon stress.

430 Our work also has some limitations. Machine learning algorithms applied to spatial  
431 proteomics are not developed to differentiate between protein translocation events,  
432 altered organellar dynamics, or altered protein synthesis and degradation rates within  
433 specific subcellular niches. However, our biochemical validations unequivocally  
434 differentiated among these events.

435 In summary, our dataset provides valuable information about UVA-triggered  
436 translocation events in subcellular niches. Our experimental strategy employing cellular  
437 fractionation, MS-based proteomics and machine learning algorithms revealed UVA  
438 redistributed approximately 20% of the skin cell proteome, highlighted by the up-  
439 regulation of redox-responsive proteins, DNA damage and mitochondrial  
440 fragmentation.

## 441 **Materials and Methods**

### 442 **Cell Culture**

443 HaCaT cell line, a spontaneously immortalized human keratinocyte, was cultured in 5%  
444 CO<sub>2</sub> at 37°C and grown in Dulbecco's Modified Eagle's Medium (DMEM)  
445 supplemented with 10% fetal bovine serum, 100 U/mL penicillin and 100 µg/mL  
446 streptomycin. Professor Mauricio S. Baptista (Institute of Chemistry, University of São  
447 Paulo) provided the cell line, and it was tested for mycoplasma contamination.

### 448 **Irradiation conditions**

449 An Oriel SOL-UV 2 solar simulator (Newport, USA) equipped with a Xenon arc lamp  
450 was used for cell irradiation. The simulator was equipped with an IR bandpass blocking  
451 filter plus a UVB-blocking filter (emission spectra of the simulator radiation with and  
452 without the UVB-blocking filter are displayed in **Fig. 2S**). Before irradiation, the  
453 simulator's output was measured with a dosimeter from International Light Inc  
454 (Newburyport, MA, USA), model IL1700, with a SED033 detector. Using the IR and  
455 UVB blocking filters, the output measured in the area where the cell plates would be  
456 positioned, at a 10 cm distance from the light source, yielded a mean of 5.0 mW/cm<sup>2</sup>,  
457 with a maximum variation of 10% between biological replicates. Each dish was  
458 irradiated for 26 minutes, corresponding to a total dose of 6 J/cm<sup>2</sup>, which humans can be  
459 exposed to during routine daily living without affecting cellular viability (**Fig. 2S**).  
460 Cells were washed three times with phosphate-buffered saline (PBS) and kept in PBS  
461 during irradiation (26 minutes). Mock-treated controls were kept in PBS and maintained  
462 in the dark at room temperature for the same amount of time.

### 463 **Subcellular proteome sample preparation**

464 For the spatial proteomics assay, two million cells were plated in 100 mm dishes 48  
465 hours before the experiments (until cells reached 80-90% confluency). An entire dish  
466 containing around eight million cells yielded at least 10 µg of protein in the fraction  
467 with the lowest yield, which was enough for mass spectrometry analysis.

468 Cells were trypsinized and harvested by centrifugation 30 minutes after irradiation. The  
469 cell pellet was washed twice in PBS and incubated for 10 minutes in 1 mL of hypotonic  
470 lysis buffer (25 mM Tris-HCl, pH 7.5, 50 mM Sucrose, 0.5 mM MgCl<sub>2</sub>, 0.2 mM  
471 EGTA) on ice. Cells were then transferred to a Potter-Elvehjem homogenizer and

472 homogenized with 30 strokes on ice (until at least 70% of cells were stained with trypan  
473 blue). After homogenization, 110  $\mu$ L of hypertonic sucrose buffer (2.5 M sucrose, 25  
474 mM Tris pH 7.5, 0.5 mM  $MgCl_2$ , 0.2 mM EGTA) was used to restore osmolarity. The  
475 cell lysate was transferred to 2 mL tubes and centrifuged twice at  $200 \times g$  for 5 minutes  
476 to remove intact cells. The lysate was then subjected to a series of differential  
477 centrifugations:  $1000 \times g$  for 10 minutes,  $3000 \times g$  for 10 minutes,  $5000 \times g$  for 10  
478 minutes,  $9000 \times g$  for 15 minutes,  $12000 \times g$  for 15 minutes,  $15000 \times g$  for 15 minutes,  
479  $30000 \times g$  for 20 minutes and  $80000 \times g$  for 40 minutes. In total, each of the five  
480 biological replicates of each condition yielded nine fractions. The supernatant was  
481 collected because it contains the remaining cytosolic proteins. Afterward, fractions  
482 enriched with different organelles were lysed in 8 M urea containing 0.1%  
483 deoxycholate. The total protein concentrations were quantified using a BCA assay kit  
484 (Thermo Scientific), and 10  $\mu$ g of protein per fraction were digested and analyzed by  
485 mass spectrometry.

#### 486 **Protein digestion**

487 Aliquots corresponding to 10  $\mu$ g of protein per sample were reduced with 5 mM  
488 dithiothreitol for one hour, alkylated with 15 mM iodoacetamide for 30 minutes, diluted  
489 ten-fold with 100 mM ammonium bicarbonate, and digested by the addition of two  
490 aliquots of trypsin (1:40 and 1:50, respectively, with an interval of four hours between  
491 the additions). The samples were digested overnight at 30°C with agitation (400 rpm).  
492 Digestion was stopped by adding 4% trifluoroacetic acid (TFA), and then the samples  
493 were dried. Samples were desalted using the StageTip protocol<sup>67</sup>. Peptides were  
494 washed ten times with 0.1% TFA in the StageTips and eluted with 50% acetonitrile and  
495 0.1% TFA.

#### 496 **LC-MS/MS measurements**

497 Each sample was injected in an Orbitrap Fusion Lumos mass spectrometer (Thermo  
498 Fisher Scientific, Bremen, Germany) coupled to a Nano EASY-nLC 1200 (Thermo  
499 Fisher Scientific, Bremen, Germany). Peptides were injected into a trap column  
500 (nanoViper C18, 3  $\mu$ m, 75  $\mu$ m  $\times$  2 cm, Thermo Scientific) with 12  $\mu$ L of solvent A  
501 (0.1% formic acid) at 980 bar. After this period, the trapped peptides were eluted onto a  
502 C18 column (nanoViper C18, 2  $\mu$ m, 75  $\mu$ m  $\times$  15 cm, Thermo Scientific) at a flow rate  
503 of 300 nL/min and subsequently separated with a 5-28% acetonitrile gradient with 0.1%



504 formic acid for 80 minutes, followed by a 28-40% acetonitrile gradient with 0.1%  
505 formic acid for 10 minutes.  
506 The eluted peptides were detected in the data-dependent acquisition mode under  
507 positive electrospray ionization conditions. A full scan ( $m/z$  400-1600) was acquired at a  
508 60000 resolution, followed by HCD fragmentation of the most intense ions, considering  
509 an intensity threshold of  $5 \times 10^4$ . Ions were filtered for fragmentation by the quadrupole  
510 with a transmission window of 1.2  $m/z$ . HCD fragmentation was performed with a  
511 normalized collision energy of 30, and the Orbitrap detector analyzed the fragments  
512 with a 30000 resolution. The number of MS2 events between full scans was determined  
513 by a cycle time of 3 seconds. A total of  $5 \times 10^5$  and  $5 \times 10^4$  ions were injected in the  
514 Orbitrap with accumulation times of 50 and 54 seconds for the full scan and MS2  
515 acquisition, respectively. Monocharged ions or ions with undetermined charges were  
516 not selected for fragmentation.

#### 517 **Comet assay**

518 A total of 500,000 cells were plated in 6-well plates 24 hours before the experiment ( $n =$   
519 3). After irradiation, cells were trypsinized and collected by centrifugation. The  
520 supernatant was discarded, and cell pellets were mixed with 100  $\mu$ L of PBS. 10  $\mu$ L of  
521 cell suspension was added to 90  $\mu$ L of 0.5% low melting point agarose. Subsequently,  
522 75  $\mu$ L of this cell suspension was pipetted onto slides pre-coated with 1.5% normal  
523 melting point agarose. Slides were covered with coverslips and kept at 4°C for 30  
524 minutes to allow the agarose to solidify. Next, the coverslips were removed, and the  
525 slides were kept in a tank containing lysis buffer (2.5 M NaCl, 100 mM EDTA, 10 mM  
526 Tris, 1% Triton X-100, and 10% DMSO, pH 10) overnight at 4°C in the dark.

527 After lysis, slides were washed with cold PBS three times in the dark and immersed  
528 three times in cold reaction buffer (40 mM HEPES, 0.1 M KCl, 0.5 mM EDTA, 0.2  
529 mg/mL BSA, pH 8) for 5 minutes each time. After that, the reaction buffer or reaction  
530 buffer containing T4 endonuclease V (0.1 U/mL), FPG (0.2 U/mL) or endonuclease III  
531 (10 U/mL) enzymes were pipetted onto each slide. Coverslips were placed over the  
532 slides, and they were incubated for 30 minutes at 37°C in the dark. The slides were then  
533 transferred to cold electrophoresis buffer (10 M NaOH, 200 mM EDTA, pH 13 in  
534 water) and incubated for 20 minutes. Then, the slides were submitted to electrophoresis  
535 for 20 minutes at 25 V, 300 mA. After electrophoresis, the slides were immersed in

536 neutralizing solution (0.4 Tris, pH 7.5) three times for 5 minutes each time and fixed in  
537 methanol for 10 minutes. After washing, all the slides were air-dried at room  
538 temperature. The DNA was stained with 20  $\mu$ L of a solution containing 2.5  $\mu$ g/mL of  
539 propidium iodide for 10 minutes. Fifty randomly selected comets per sample were  
540 analyzed on a fluorescence microscope (Olympus BX51) using the Komet 6 software.  
541 Two technical and four biological replicates were analyzed per condition.

## 542 **Immunofluorescence**

543 Cells were seeded on 8-well Lab-Tek® II Chambered Coverglass plates (Thermo  
544 Scientific, # 155409) under standard cell culture conditions. Samples were fixed with  
545 ice-cold 4% paraformaldehyde in PBS without  $\text{Ca}^{2+}$  and  $\text{Mg}^{2+}$ . After removing the PFA,  
546 the cells were incubated for 20 minutes at room temperature with freshly prepared  
547 permeabilization buffer (0.1 % Triton X-100, PBS, pH 7.4). After that, cells were  
548 washed in PBS three times for 5 minutes each time.

549 For cell staining, samples were first rinsed for one hour with blocking buffer (3% fetal  
550 bovine serum, PBS, pH 7.4) at room temperature. Then, primary antibodies (OAT,  
551 Invitrogen #PA5-66715, 1:500; Fumarase, Invitrogen #PA5-82899, 1:500; Casein  
552 Kinase 2 beta, Abcam #ab151784, 1:500; PDHA1 [9H9AF5], Abcam #ab110330,  
553 1:200, and COX4I1 Abcam #ab33985) were diluted (as indicated above) in blocking  
554 buffer and incubated overnight at 4°C. Next, the chambered coverglass plates were  
555 rinsed three times with PBS and cells were labeled with fluorescently conjugated  
556 secondary antibody (anti-Rabbit Alexa Fluor 488, Invitrogen #A-11008, 1:500; anti-  
557 Mouse Alexa Fluor 647, Abcam # ab150119, 1:500) in blocking buffer for one hour at  
558 room temperature. Afterward, unbound secondary antibodies were removed by washing  
559 with PBS three times for 5 minutes each at room temperature. Finally, nuclei were  
560 labeled with 1  $\mu$ g/mL Hoechst 33342 in PBS (Invitrogen #H1399). Imaging was  
561 performed in PBS. A Zeiss LSM 710 laser scanning confocal microscope was used, and  
562 cells were imaged using x63 oil immersion objective (Plan Apochromat NA 1.40).

## 563 **Respirometry**

564 One day before the experiment, on four different days, 60,000 cells were plated on  
565 XF24 cell plates (Agilent) to measure cell respiration. After irradiation, PBS was  
566 replaced by DMEM without sodium bicarbonate, and cells were incubated for 1 hour at

567 37°C and atmospheric pressure of CO<sub>2</sub>. Oxygen consumption rate (OCR) was measured  
568 in a Seahorse XF24 Analyzer (Agilent), before and after subsequent additions of 1 μM  
569 oligomycin, 1 μM CCCP and a mix of 1 μM antimycin and 1 μM rotenone. Each  
570 compound was added after three cycles of measurements of 3 minutes each. The  
571 concentration of CCCP was determined through the previous titration. At the end of the  
572 experiments, each well was washed once with PBS and proteins were resuspended in  
573 100 μM ammonium bicarbonate, containing 8 M urea and 1% sodium deoxycholate.  
574 After homogenization, protein concentration was determined by using a BCA assay kit.  
575 The OCR values were normalized by the amount of total protein in each well.

## 576 **Statistical Analysis**

### 577 **Descriptive data analysis**

578 Raw files were processed using MaxQuant<sup>68</sup>. Each fraction was considered a different  
579 sample in the experimental design annotation file required for the MaxQuant analysis. A  
580 matrix of relative quantification data (LFQ)<sup>69</sup> for proteins in each fraction was obtained  
581 and used for subsequent analysis. Each protein was normalized by the total sum of the  
582 LFQs for a given replicate/cell map, yielding a value between 0 and 1. Proteins that  
583 were not quantified in at least 30 of the 90 samples were filtered out to remove  
584 uninformative fractionation profiles with missing values generated by stochastic  
585 fragmentation in the shotgun proteomics approach.

586 Dimensionality reduction was achieved using the t-distributed stochastic neighbor  
587 embedding technique (t-SNE)<sup>70</sup>. The fractionation data was plotted with different  
588 perplexity parameters (perplexity = 30 yielded the best cluster separation). The plots  
589 were overlaid with categorical subcellular classifications from the Cell Atlas initiative<sup>71</sup>,  
590 Uniprot<sup>72</sup> and Gene Ontology<sup>73</sup> databases, providing information on the clusterization of  
591 different subcellular compartments.

592 Organellar markers were selected based on a previous subcellular proteomics study<sup>22</sup>  
593 and the curation of proteins classified as unimodally distributed by the Cell Atlas,  
594 Uniprot and Gene Ontology databases. Markers had to be reproducible across all  
595 replicates, and profile plots were manually curated to remove proteins with missing  
596 values. Organellar markers from four different compartments (cytosol, mitochondria,  
597 nucleus, and secretory organelles) were assigned with different colors to visualize

598 clusterization in the t-SNE plots. The secretory compartment comprises proteins  
599 initially assigned to peroxisomes, endoplasmic reticulum (ER), plasma membrane,  
600 Golgi apparatus and lysosomes. These organelles were grouped under the term  
601 “secretory” because they share similar fractionation profiles that were not well  
602 distinguished by the machine learning algorithms.

### 603 **Localization prediction**

604 As described previously<sup>27,74</sup>, a supervised machine learning approach was used for the  
605 subcellular localization prediction. We used a model of an averaged neural networks  
606 algorithm<sup>27</sup> to produce the paper's results, but a support vector machine was also tested  
607 and yielded similar results. The organellar markers were used to train the model for  
608 subcellular localization prediction. Organellar markers were divided into a training and  
609 validation set (80/20% proportion for each set) with a 5-fold cross-validation through  
610 100 iterations of the algorithm. We used a grid search to achieve hyperparameter tuning.  
611 The accuracy of the classifier was estimated through the F1 score<sup>74</sup>, and the best  
612 hyperparameters were chosen according to the accuracy of the classifier. The best  
613 network size ranged from 4 to 6, and the best decay was  $10^{-4}$ .

### 614 **Translocation prediction**

615 The TRANSPIRE pipeline was used for the translocation prediction, as previously<sup>25</sup>.  
616 Curated organellar markers were utilized to generate synthetic translocations, which are  
617 then used to train the learning algorithm in distinguishing translocation classes and  
618 consequently translocating from non-translocating proteins. In brief, each organellar  
619 marker in the control samples is concatenated with every other organellar marker of the  
620 treated samples, producing synthetic translocations and non-translocations (when  
621 markers of the same compartment are concatenated). For example, a synthetic  
622 translocation that simulates the migration of a protein from the nucleus to the cytosol  
623 would have a fractionation profile that is characterized by the combination of a nuclear  
624 marker profile in all control samples (45 fractions) with the cytosolic marker profile in  
625 the treated samples (also 45 fractions, yielding a total of 90 “fractions” per synthetic  
626 translocation).

627 Synthetic translocations were used to train a Stochastic Variational Gaussian Process  
628 Classifier (SVGPC) implemented in TRANSPIRE through the GPFlow package (built  
629 upon the TensorFlow platform in Python). This model is composed of a kernel function,

630 a likelihood function,  $n$  latent variables (which account for the number of translocation  
631 classes), a training set, and a subset of the training set used as inducing points<sup>25</sup>. The  
632 model implemented in TRANSPIRE uses softmax as a likelihood function to improve  
633 score calibration.

634 Hyperparameter tuning involved choosing the kernel type (squared exponential, rational  
635 quadratic, exponential Matern32 and Matern52, as implemented by TRANSPIRE  
636 through GPFlow) and the number of inducing points (ranging from 1 to 500). The  
637 synthetic translocation data were divided into training, validation, and test sets in a  
638 50/20/20% proportion, respectively, during training. The training data was further split  
639 into five balanced folds during hyperparameter tuning, allowing for a 5-fold cross-  
640 validation. A class imbalance was prevented by allowing the most frequent  
641 translocation classes to have, at most, three times more proteins than the least frequent.  
642 The best hyperparameters selected through the grid search were the squared exponential  
643 kernel and 30 inducing points (optimization plots are shown in the Supporting  
644 Information). The results were evaluated by maximizing the evidence lower bound  
645 (ELBO) using the Adam optimizer. Afterward, the resulting model was used to predict  
646 translocations in the actual dataset and performance was evaluated based on the held-out  
647 test partition of the synthetic translocation data.

648 The output of the TRANSPIRE pipeline entails the classification of a translocation class  
649 (e.g., “Nucleus to Cytosol”) for each protein plus a classifier score. The classifier score  
650 ranges from 0 to 1 for each translocation class, and the sum of the scores for all classes  
651 for each protein should be equal to 1. Class prediction is based on the highest classifier  
652 score for a given translocation class. This score is referred to as “predicted scores” in  
653 the spreadsheets in the Supporting Information. Additionally, the TRANSPIRE pipeline  
654 provides a translocation score, defined as the sum of the predicted scores for all true  
655 translocation classes. This score accounts for situations in which high classifier scores  
656 are split among at least two translocation classes.

657 TRANSPIRE also allows for the computation of false-positive rates (FPR), based on the  
658 model’s performance, setting thresholds for the translocation scores to minimize the  
659 likelihood of false positives. Herein, we adopted a 0.5% FPR to generate a more  
660 stringent list of translocation targets.

661

## 662 **References**

- 663 1. Schuch, A. P., Moreno, N. C., Schuch, N. J., Menck, C. F. M. & Garcia, C. C. M. Sunlight  
664 damage to cellular DNA: Focus on oxidatively generated lesions. *Free Radic. Biol. Med.*  
665 **107**, 110–124 (2017).
- 666 2. El Ghissassi, F. *et al.* A review of human carcinogens--part D: radiation. *Lancet Oncol.* **10**,  
667 751–752 (2009).
- 668 3. Premi, S. *et al.* Chemiexcitation of melanin derivatives induces DNA photoproducts long  
669 after UV exposure. *Science* **347**, 842–847 (2015).
- 670 4. Ikehata, H. Mechanistic considerations on the wavelength-dependent variations of UVR  
671 genotoxicity and mutagenesis in skin: The discrimination of UVA-signature from UV-  
672 signature mutation. *Photochem Photobiol Sci* **17**, 1861–1871 (2018).
- 673 5. Wondrak, G. T., Jacobson, M. K. & Jacobson, E. L. Endogenous UVA-photosensitizers:  
674 mediators of skin photodamage and novel targets for skin photoprotection. *Photochem.*  
675 *Photobiol. Sci.* **5**, 215–237 (2006).
- 676 6. Chen, H., Weng, Q. Y. & Fisher, D. E. UV Signaling Pathways within the Skin. *J Invest*  
677 *Dermatol* **134**, 2080–2085 (2014).
- 678 7. Thul, P. J. *et al.* A subcellular map of the human proteome. *Science* **356**, (2017).
- 679 8. de Gruijl, F. R., van Kranen, H. J. & Mullenders, L. H. F. UV-induced DNA damage,  
680 repair, mutations and oncogenic pathways in skin cancer. *Journal of Photochemistry and*  
681 *Photobiology B: Biology* **63**, 19–27 (2001).
- 682 9. Moreno, N. C. *et al.* Whole-exome sequencing reveals the impact of UVA light  
683 mutagenesis in xeroderma pigmentosum variant human cells. *Nucleic Acids Research* **48**,  
684 1941–1953 (2020).
- 685 10. He, Y.-Y. *et al.* Expression Profiling of Human Keratinocyte Response to Ultraviolet A:  
686 Implications in Apoptosis. *Journal of Investigative Dermatology* **122**, 533–543 (2004).
- 687 11. Edifizi, D. *et al.* Multilayered Reprogramming in Response to Persistent DNA Damage in  
688 *C. elegans*. *Cell Reports* **20**, 2026–2043 (2017).
- 689 12. Elia, A. E. H. *et al.* Quantitative Proteomic Atlas of Ubiquitination and Acetylation in the  
690 DNA Damage Response. *Mol. Cell* **59**, 867–881 (2015).
- 691 13. Zhou, C. *et al.* Profiling DNA damage-induced phosphorylation in budding yeast reveals  
692 diverse signaling networks. *Proc Natl Acad Sci USA* **113**, E3667–E3675 (2016).
- 693 14. Larance, M. & Lamond, A. I. Multidimensional proteomics for cell biology. *Nature*  
694 *Reviews Molecular Cell Biology* **16**, 269–280 (2015).
- 695 15. Breker, M. & Schuldiner, M. The emergence of proteome-wide technologies: systematic  
696 analysis of proteins comes of age. *Nature Reviews Molecular Cell Biology* **15**, 453–464  
697 (2014).
- 698 16. Mattiazzi Usaj, M. *et al.* High-Content Screening for Quantitative Cell Biology. *Trends*  
699 *Cell Biol.* **26**, 598–611 (2016).
- 700 17. Lundberg, E. & Borner, G. H. H. Spatial proteomics: a powerful discovery tool for cell  
701 biology. *Nat. Rev. Mol. Cell Biol.* **20**, 285–302 (2019).
- 702 18. Gatto, L. *et al.* A Foundation for Reliable Spatial Proteomics Data Analysis. *Mol Cell*  
703 *Proteomics* **13**, 1937–1952 (2014).
- 704 19. Andersen, J. S. *et al.* Proteomic characterization of the human centrosome by protein  
705 correlation profiling. *Nature* **426**, 570–574 (2003).
- 706 20. Foster, L. J. *et al.* A Mammalian Organelle Map by Protein Correlation Profiling. *Cell* **125**,  
707 187–199 (2006).

- 708 21. Mulvey, C. M. *et al.* Using hyperLOPIT to perform high-resolution mapping of the spatial  
709 proteome. *Nat Protoc* **12**, 1110–1135 (2017).
- 710 22. Geladaki, A. *et al.* Combining LOPIT with differential ultracentrifugation for high-  
711 resolution spatial proteomics. *Nature Communications* **10**, 331 (2019).
- 712 23. Itzhak, D. N. *et al.* A Mass Spectrometry-Based Approach for Mapping Protein Subcellular  
713 Localization Reveals the Spatial Proteome of Mouse Primary Neurons. *Cell Reports* **20**,  
714 2706–2718 (2017).
- 715 24. Jean Beltran, P. M., Mathias, R. A. & Cristea, I. M. A Portrait of the Human Organelle  
716 Proteome In Space and Time during Cytomegalovirus Infection. *cels* **3**, 361-373.e6 (2016).
- 717 25. Kennedy, M. A., Hofstadter, W. A. & Cristea, I. M. TRANSPIRE: A Computational  
718 Pipeline to Elucidate Intracellular Protein Movements from Spatial Proteomics Data Sets. *J.*  
719 *Am. Soc. Mass Spectrom.* **31**, 1422–1439 (2020).
- 720 26. Halliday, G. M. & Rana, S. Waveband and Dose Dependency of Sunlight-induced  
721 Immunomodulation and Cellular Changes†. *Photochemistry and Photobiology* **84**, 35–46  
722 (2008).
- 723 27. Gatto, L., Breckels, L. M., Wieczorek, S., Burger, T. & Lilley, K. S. Mass-spectrometry-  
724 based spatial proteomics data analysis using pRoloc and pRolocdata. *Bioinformatics* **30**,  
725 1322–1324 (2014).
- 726 28. Craxton, A. *et al.* PAXX and its paralogs synergistically direct DNA polymerase  $\lambda$  activity  
727 in DNA repair. *Nature Communications* **9**, 3877 (2018).
- 728 29. Brzoska, K. & Szumiel, I. Signalling loops and linear pathways: NF- $\kappa$ B activation in  
729 response to genotoxic stress. *Mutagenesis* **24**, 1–8 (2008).
- 730 30. Remy, G. *et al.* Differential activation of p38MAPK isoforms by MKK6 and MKK3.  
731 *Cellular Signalling* **22**, 660–667 (2010).
- 732 31. Hintsala, H.-R., Siponen, M., Haapasaari, K.-M., Karihtala, P. & Soini, Y. Claudins 1, 2, 3,  
733 4, 5 and 7 in solar keratosis and squamocellular carcinoma of the skin. *Int J Clin Exp Pathol*  
734 **6**, 2855–2863 (2013).
- 735 32. Hildesheim, J., Awwad, R. T. & Fornace, A. J. p38 Mitogen-Activated Protein Kinase  
736 Inhibitor Protects the Epidermis Against the Acute Damaging Effects of Ultraviolet  
737 Irradiation by Blocking Apoptosis and Inflammatory Responses. *Journal of Investigative*  
738 *Dermatology* **122**, 497–502 (2004).
- 739 33. Krenciute, G. *et al.* Nuclear BAG6-UBL4A-GET4 Complex Mediates DNA Damage  
740 Signaling and Cell Death. *J. Biol. Chem.* **288**, 20547–20557 (2013).
- 741 34. Nishi, R. *et al.* Centrin 2 Stimulates Nucleotide Excision Repair by Interacting with  
742 Xeroderma Pigmentosum Group C Protein. *Molecular and Cellular Biology* **25**, 5664–5674  
743 (2005).
- 744 35. Trojan, P. *et al.* Light-dependent CK2-mediated phosphorylation of centrin regulates  
745 complex formation with visual G-protein. *Biochimica et Biophysica Acta (BBA) -*  
746 *Molecular Cell Research* **1783**, 1248–1260 (2008).
- 747 36. Franz, A. *et al.* Chromatin-associated degradation is defined by UBXN-3/FAF1 to  
748 safeguard DNA replication fork progression. *Nat Commun* **7**, (2016).
- 749 37. Verger, A. *et al.* Mechanisms Directing the Nuclear Localization of the CtBP Family  
750 Proteins. *Molecular and Cellular Biology* **26**, 4882–4894 (2006).
- 751 38. Wan, F. & Lenardo, M. J. The Nuclear Signaling of NF- $\kappa$ B – Current Knowledge, New  
752 Insights, and Future Perspectives. *Cell Res* **20**, 24–33 (2010).
- 753 39. Ito, S. *et al.* MMXD, a TFIIH-Independent XPD-MMS19 Protein Complex Involved in  
754 Chromosome Segregation. *Molecular Cell* **39**, 632–640 (2010).

- 755 40. Filhol, O. *et al.* Casein kinase II and the tumor suppressor protein P53 associate in a  
756 molecular complex that is negatively regulated upon P53 phosphorylation. *J. Biol. Chem.*  
757 **267**, 20577–20583 (1992).
- 758 41. Montenarh, M. Protein kinase CK2 in DNA damage and repair. *Translational Cancer*  
759 *Research* **5**, (2016).
- 760 42. Coin, F. *et al.* Phosphorylation of XPB helicase regulates TFIIH nucleotide excision repair  
761 activity. *The EMBO Journal* **23**, 4835–4846 (2004).
- 762 43. Grecu, D. & Assairi, L. CK2 phosphorylation of human centrin 1 and 2 regulates their  
763 binding to the DNA repair protein XPC, the centrosomal protein Sfi1 and the  
764 phototransduction protein transducin  $\beta$ . *FEBS Open Bio* **4**, 407–419 (2014).
- 765 44. Teitz, T. *et al.* Expression of the cDNA for the beta subunit of human casein kinase II  
766 confers partial UV resistance on xeroderma pigmentosum cells. *Mutation Research/DNA*  
767 *Repair* **236**, 85–97 (1990).
- 768 45. Cochet, C. & Chambaz, E. M. Oligomeric structure and catalytic activity of G type casein  
769 kinase. Isolation of the two subunits and renaturation experiments. *J Biol Chem* **258**, 1403–  
770 1406 (1983).
- 771 46. Delinasios, G. J., Karbaschi, M., Cooke, M. S. & Young, A. R. Vitamin E inhibits the  
772 UVAI induction of “light” and “dark” cyclobutane pyrimidine dimers, and oxidatively  
773 generated DNA damage, in keratinocytes. *Sci Rep* **8**, 1–12 (2018).
- 774 47. DJAVAHERI-MERGNY, M., GRAS, M.-P., MERGNY, J.-L. & DUBERTRET, L. UV-A-  
775 induced decrease in nuclear factor- $\kappa$ B activity in human keratinocytes. *Biochemical Journal*  
776 **338**, 607–613 (1999).
- 777 48. Saliou, C. *et al.* Antioxidants modulate acute solar ultraviolet radiation-induced NF-kappa-  
778 B activation in a human keratinocyte cell line. *Free Radical Biology and Medicine* **26**, 174–  
779 183 (1999).
- 780 49. Vile, G. F., Tanew-Ilitschew, A. & Tyrrell, R. M. Activation of NF-kappa B in human skin  
781 fibroblasts by the oxidative stress generated by UVA radiation. *Photochem Photobiol* **62**,  
782 463–468 (1995).
- 783 50. Tebbe, B., Schwarz, C., Ruderisch, H. S., Treudler, R. & Orfanos, C. E. L-Ascorbic Acid  
784 Increases NF $\kappa$ B Binding Activity in UVA-Irradiated HaCaT Keratinocytes. *J Invest*  
785 *Dermatol* **117**, 154–156 (2001).
- 786 51. Yogev, O. *et al.* Fumarase: A Mitochondrial Metabolic Enzyme and a Cytosolic/Nuclear  
787 Component of the DNA Damage Response. *PLoS Biol* **8**, (2010).
- 788 52. Wang, G., Shang, L., Burgett, A. W. G., Harran, P. G. & Wang, X. Diazonamide toxins  
789 reveal an unexpected function for ornithine  $\delta$ -amino transferase in mitotic cell division.  
790 *Proc Natl Acad Sci U S A* **104**, 2068–2073 (2007).
- 791 53. Sabouny, R. & Shutt, T. E. Reciprocal Regulation of Mitochondrial Fission and Fusion.  
792 *Trends in Biochemical Sciences* **45**, 564–577 (2020).
- 793 54. Twig, G. & Shirihai, O. S. The Interplay Between Mitochondrial Dynamics and Mitophagy.  
794 *Antioxid Redox Signal* **14**, 1939–1951 (2011).
- 795 55. Chatzidoukaki, O., Goulielmaki, E., Schumacher, B. & Garinis, G. A. DNA Damage  
796 Response and Metabolic Reprogramming in Health and Disease. *Trends in Genetics* **36**,  
797 777–791 (2020).
- 798 56. Yefi, R. *et al.* Protein kinase CK2 promotes cancer cell viability via up-regulation of  
799 cyclooxygenase-2 expression and enhanced prostaglandin E2 production. *Journal of*  
800 *Cellular Biochemistry* **112**, 3167–3175 (2011).



- 801 57. Gray, G. K., McFarland, B. C., Rowse, A. L., Gibson, S. A. & Benveniste, E. N.  
802 Therapeutic CK2 inhibition attenuates diverse prosurvival signaling cascades and decreases  
803 cell viability in human breast cancer cells. *Oncotarget* **5**, 6484–6496 (2014).
- 804 58. Cooper, S. J. & Bowden, G. T. Ultraviolet B Regulation of Transcription Factor Families.  
805 *Curr Cancer Drug Targets* **7**, 325–334 (2007).
- 806 59. Djavaheri-Mergny, M. *et al.* UV-A irradiation induces a decrease in the mitochondrial  
807 respiratory activity of human NCTC 2544 keratinocytes. *Free Radical Research* **34**, 583–  
808 594 (2001).
- 809 60. Jugé, R. *et al.* Quantification and Characterization of UVB-Induced Mitochondrial  
810 Fragmentation in Normal Primary Human Keratinocytes. *Sci Rep* **6**, 35065 (2016).
- 811 61. Berneburg, M. *et al.* Induction of the Photoaging-Associated Mitochondrial Common  
812 Deletion In Vivo in Normal Human Skin. *J Invest Dermatol* **122**, 1277–1283 (2004).
- 813 62. Zhang, Z., Liu, L., Wu, S. & Xing, D. Drp1, Mff, Fis1, and MiD51 are coordinated to  
814 mediate mitochondrial fission during UV irradiation-induced apoptosis. *The FASEB*  
815 *Journal* **30**, 466–476 (2016).
- 816 63. Wang, P. *et al.* Dynamin-related protein Drp1 is required for Bax translocation to  
817 mitochondria in response to irradiation-induced apoptosis. *Oncotarget* **6**, 22598–22612  
818 (2015).
- 819 64. Tondera, D. *et al.* SLP-2 is required for stress-induced mitochondrial hyperfusion. *The*  
820 *EMBO Journal* **28**, 1589–1600 (2009).
- 821 65. Willems, P. H. G. M., Rossignol, R., Dieteren, C. E. J., Murphy, M. P. & Koopman, W. J.  
822 H. Redox Homeostasis and Mitochondrial Dynamics. *Cell Metabolism* **22**, 207–218 (2015).
- 823 66. Rakovic, A. *et al.* Mutations in PINK1 and Parkin Impair Ubiquitination of Mitofusins in  
824 Human Fibroblasts. *PLOS ONE* **6**, e16746 (2011).
- 825 67. Rappsilber, J., Mann, M. & Ishihama, Y. Protocol for micro-purification, enrichment, pre-  
826 fractionation and storage of peptides for proteomics using StageTips. *Nat Protoc* **2**, 1896–  
827 1906 (2007).
- 828 68. Cox, J. & Mann, M. MaxQuant enables high peptide identification rates, individualized  
829 p.p.b.-range mass accuracies and proteome-wide protein quantification. *Nature*  
830 *Biotechnology* **26**, 1367–1372 (2008).
- 831 69. Cox, J. *et al.* Accurate Proteome-wide Label-free Quantification by Delayed Normalization  
832 and Maximal Peptide Ratio Extraction, Termed MaxLFQ \*. *Molecular & Cellular*  
833 *Proteomics* **13**, 2513–2526 (2014).
- 834 70. Maaten, L. van der & Hinton, G. Visualizing Data using t-SNE. *Journal of Machine*  
835 *Learning Research* **9**, 2579–2605 (2008).
- 836 71. Rozenblatt-Rosen, O., Stubbington, M. J. T., Regev, A. & Teichmann, S. A. The Human  
837 Cell Atlas: from vision to reality. *Nature* **550**, 451–453 (2017).
- 838 72. The UniProt Consortium. UniProt: the universal protein knowledgebase. *Nucleic Acids*  
839 *Research* **45**, D158–D169 (2017).
- 840 73. Ashburner, M. *et al.* Gene Ontology: tool for the unification of biology. *Nature Genetics*  
841 **25**, 25–29 (2000).
- 842 74. Breckels, L. M., Mulvey, C. M., Lilley, K. S. & Gatto, L. A Bioconductor workflow for  
843 processing and analysing spatial proteomics data. *F1000Res* **5**, 2926 (2018).
- 844

845 **Acknowledgments**

846 We thank professor Marisa Helena Gennari de Medeiros for kindly providing access to  
847 her laboratory and equipment. We are grateful to professor Fabio Rodrigues and  
848 members of his laboratory, especially Evandro Pereira da Silva, for kindly helping with  
849 the solar simulator. We also thank Camille C. Caldeira da Silva and professor Alicia  
850 Kowaltowski for kindly helping with the Seahorse experiment. We are grateful to Dr.  
851 Mariana Pereira Massafra and MSc. Izaora Nobuko Toma for their technical  
852 assistance. The Redox Proteomics Core of the Mass Spectrometry Resource at  
853 Chemistry Institute, University of Sao Paulo, is acknowledged for access to state-of-the-  
854 art MS instrumentation. The Albert Einstein Hospital is also acknowledged for technical  
855 assistance and access to the confocal microscope.

856 **Funding**

857 Fundação de Amparo à Pesquisa do Estado de São Paulo (FAPESP) grant 2012/12663-1  
858 (PDM)  
859 FAPESP grant 2016/11430-4 (HPV)  
860 FAPESP grant 2016/00696-3 (GER)  
861 FAPESP grant 15/07768-7 (FGR)  
862 CEPID Redoxoma grant 2013/07937-8 (PDM)  
863 Conselho Nacional de Desenvolvimento Científico e Tecnológico grant 402683/2016-1  
864 (GER)  
865 Conselho Nacional de Desenvolvimento Científico e Tecnológico grant 302120/2018-1  
866 (PDM)  
867 NAP Redoxoma PRPUSP 2011.1.9352.1.8 (PDM)  
868 John Simon Guggenheim Memorial Foundation (PDM)

869  
870 **Authors Contribution**

871 HPV, GER and PDM conceptualized the study. HPV performed experiments, analyzed  
872 the data and wrote the first draft of the manuscript. FGR and APYC performed the  
873 immunofluorescence assays and discussed the results. BDCC performed the comet  
874 assay experiment and also discussed the results. GER and PDM acquired funding,  
875 provided the resources, critically read and edited the final version of the manuscript.

876

877 **Competing interests**

878 The authors declare no competing interests.

879 **Data availability**

880 The proteomic dataset generated during this study has been deposited to the  
881 ProteomeXchange Consortium (<http://www.proteomexchange.org/>) via the PRIDE  
882 repository (identifier: PXD027941). All processed data are available in the Supporting  
883 Information.

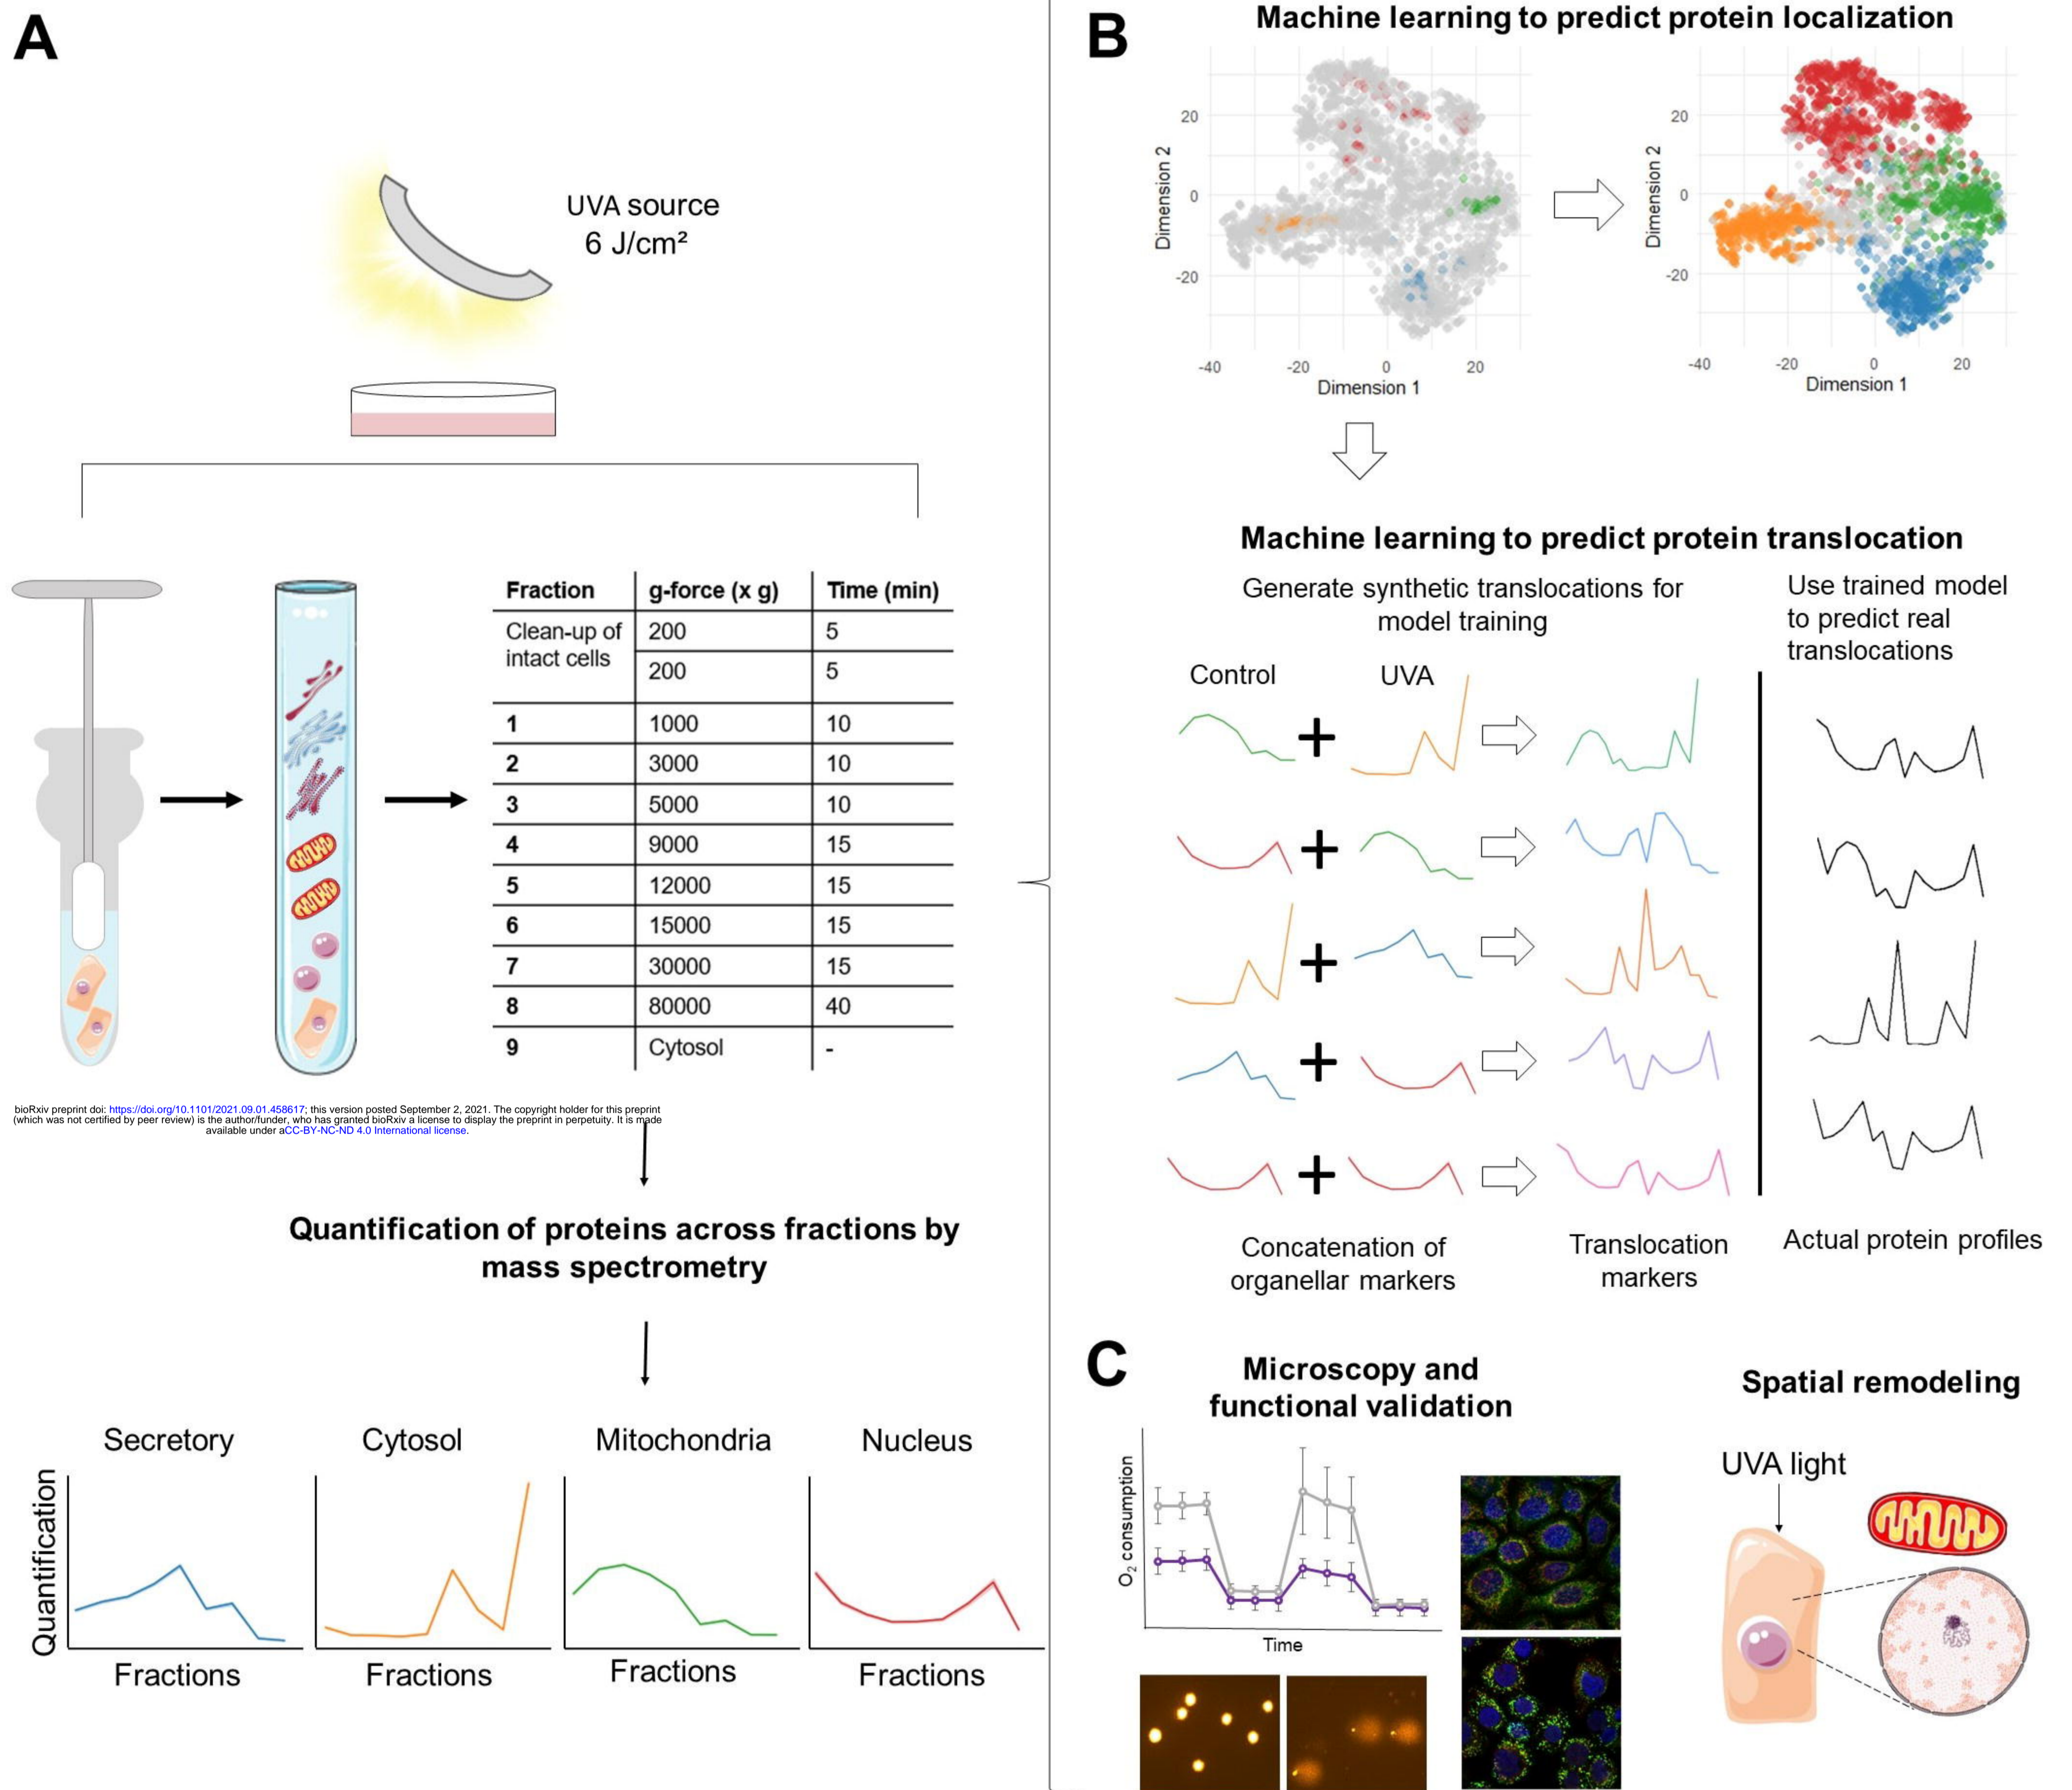

**Fig. 1. Proteomic approach to define spatial changes in protein distribution upon light stress.**

**(A)** Experimental protocol. **(B)** Computational pipelines used to define changes in subcellular organization promoted by UVA light in HaCaT cells. **(C)** Validation of results using traditional biochemical assays.

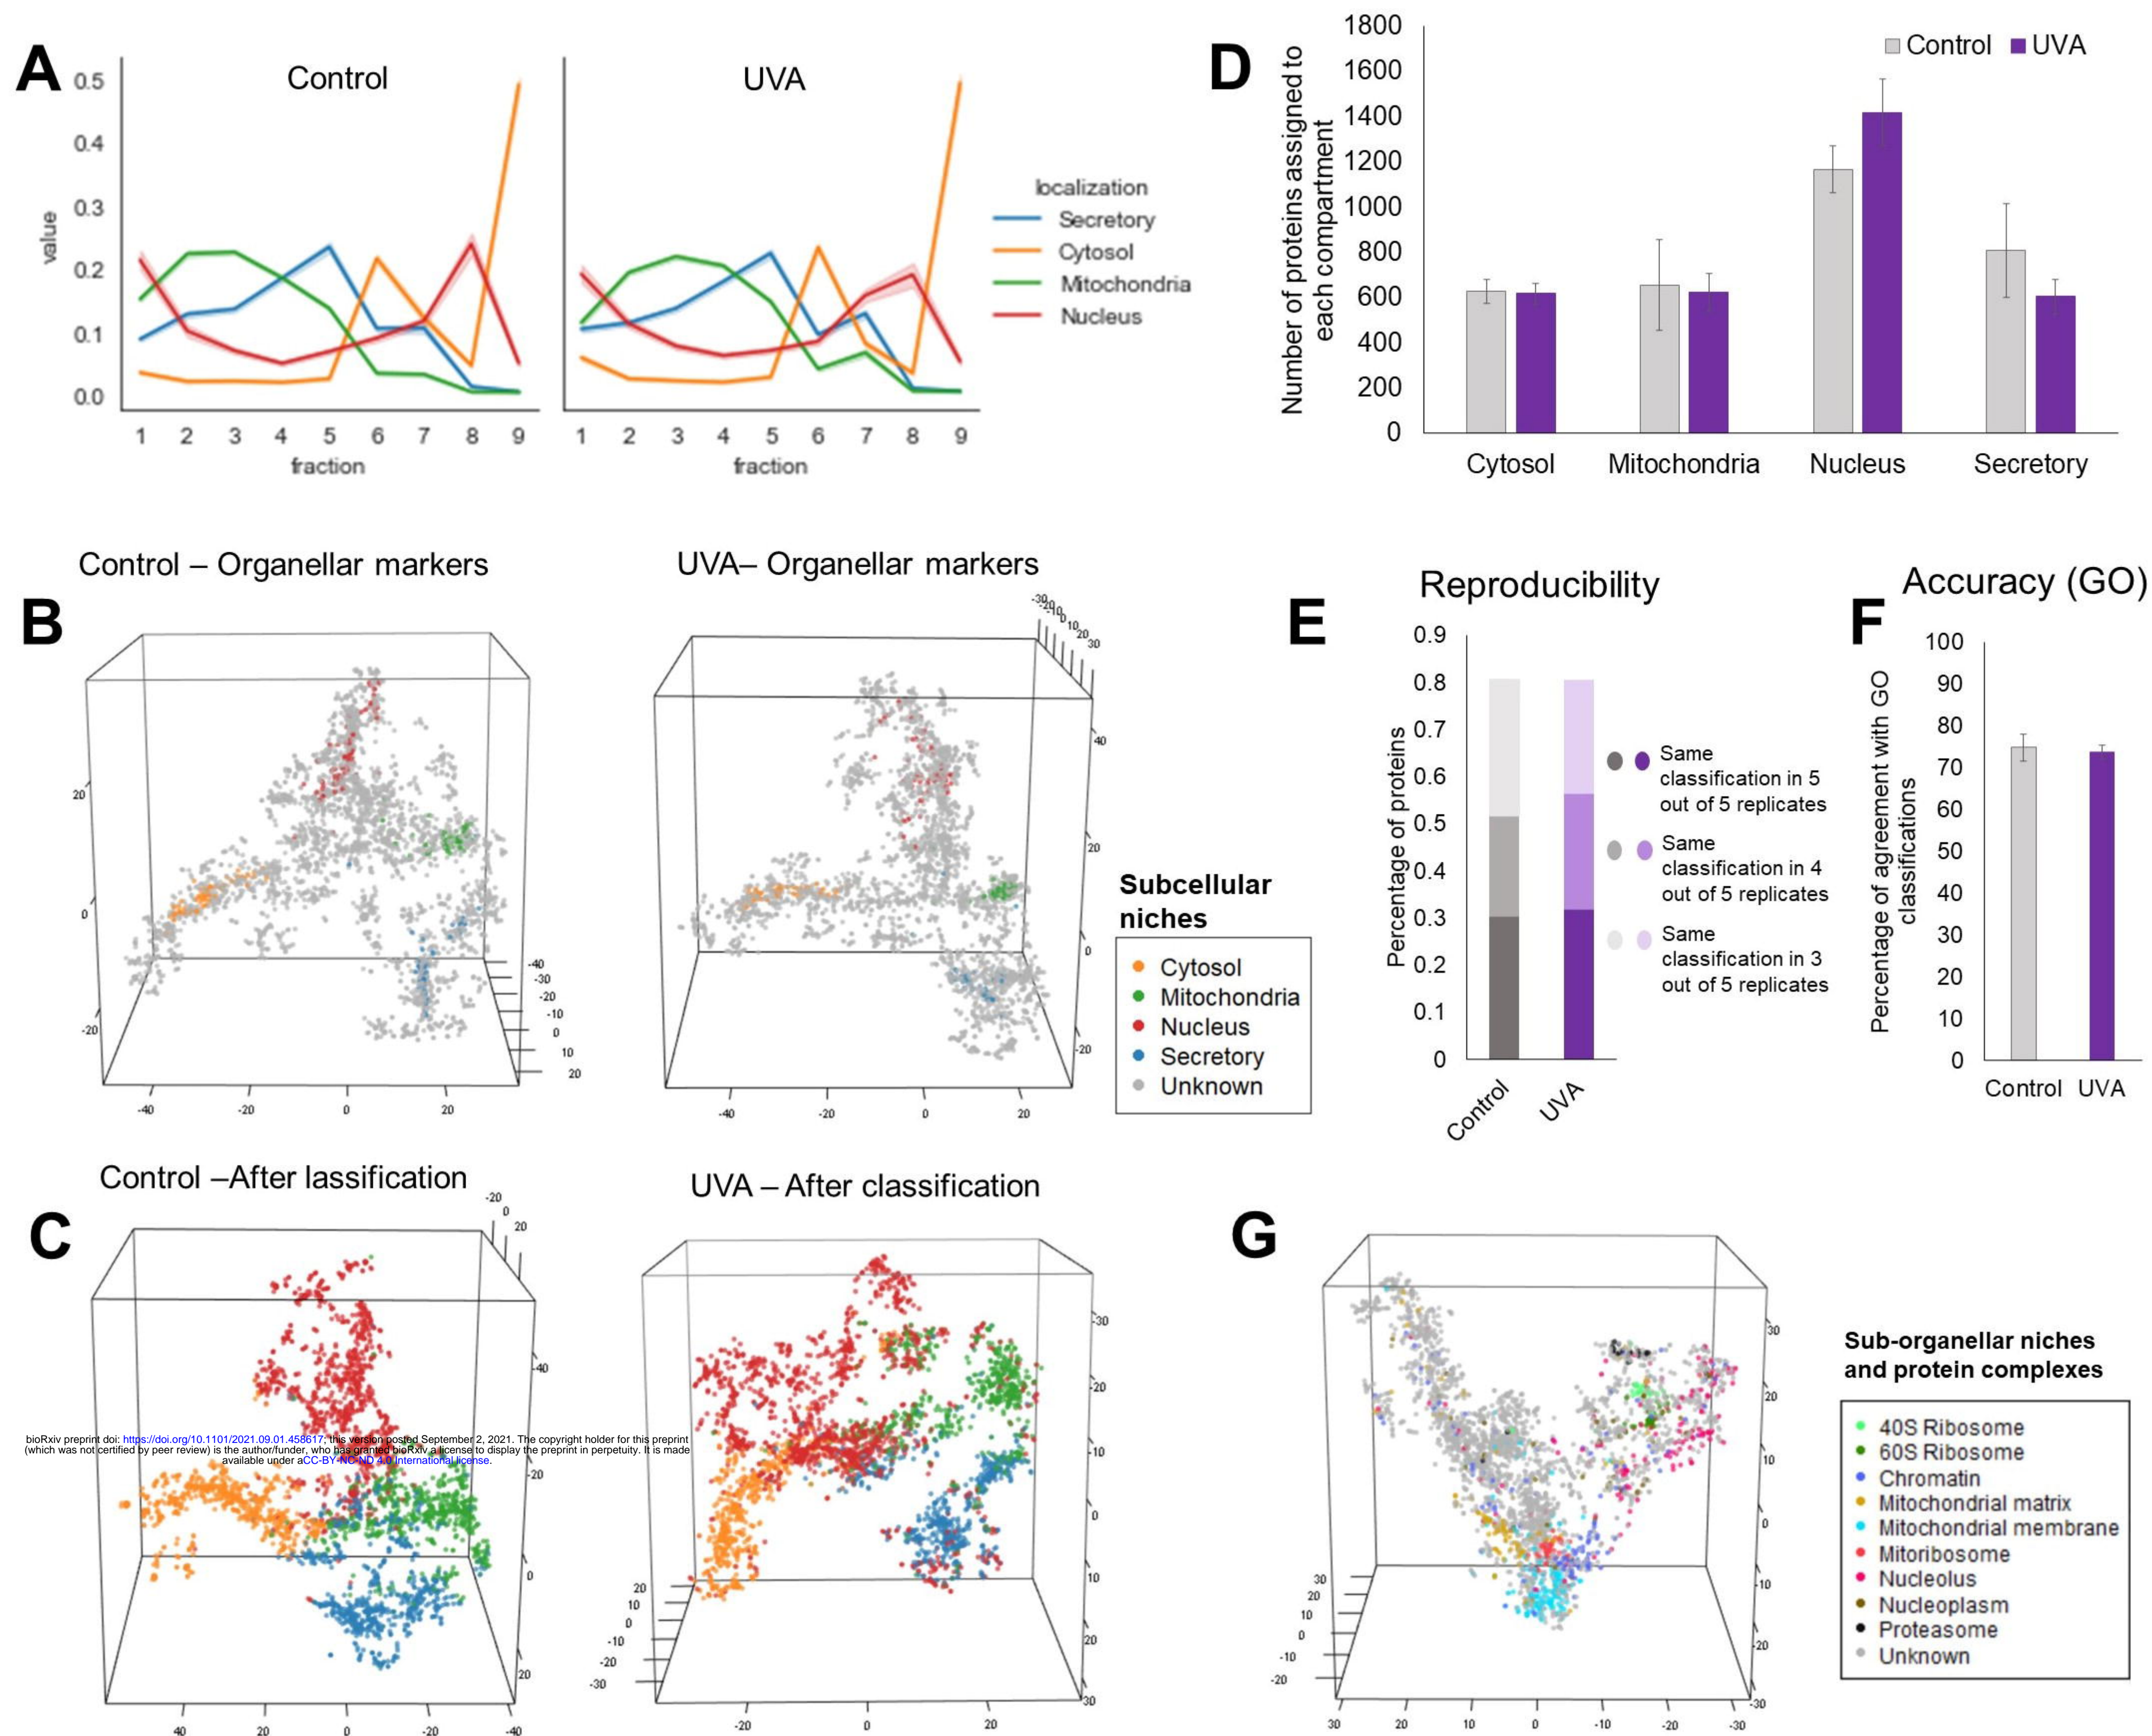

**Fig. 2. Identification of subcellular patterns in HaCaT's spatial proteomics dataset.**

(A) Profile plots of organellar markers in the HaCaT dataset. Shaded intervals represent standard errors, and values represent means. Five biological replicates per group were employed for the spatial proteomics experiment.

(B) 3D representation of subcellular fractionation data using t-SNE. The maps were overlaid with organellar markers.

(C) t-SNE plots of all control and irradiated samples overlaid with the most frequent classifications obtained for each protein across replicates using the neural network algorithm for predicting localization.

(D) Numbers of proteins assigned to the cytosol, mitochondria, nucleus, and secretory organelles by condition. Bars represent the mean number of proteins assigned to each compartment, and error bars represent the standard deviation.

(E) Reproducibility of classifications across replicates. Bars represent the percentage of proteins that received the same classification in 3, 4 or 5 biological replicates out of the total 5.

(F) Accuracy of the neural network predictions obtained by comparing the predicted subcellular localizations with Gene Ontology information. Bars represent means per condition, and error bars represent standard deviations.

(G) t-SNE plots overlaid with sub-organellar markers and colocalizing protein complexes.

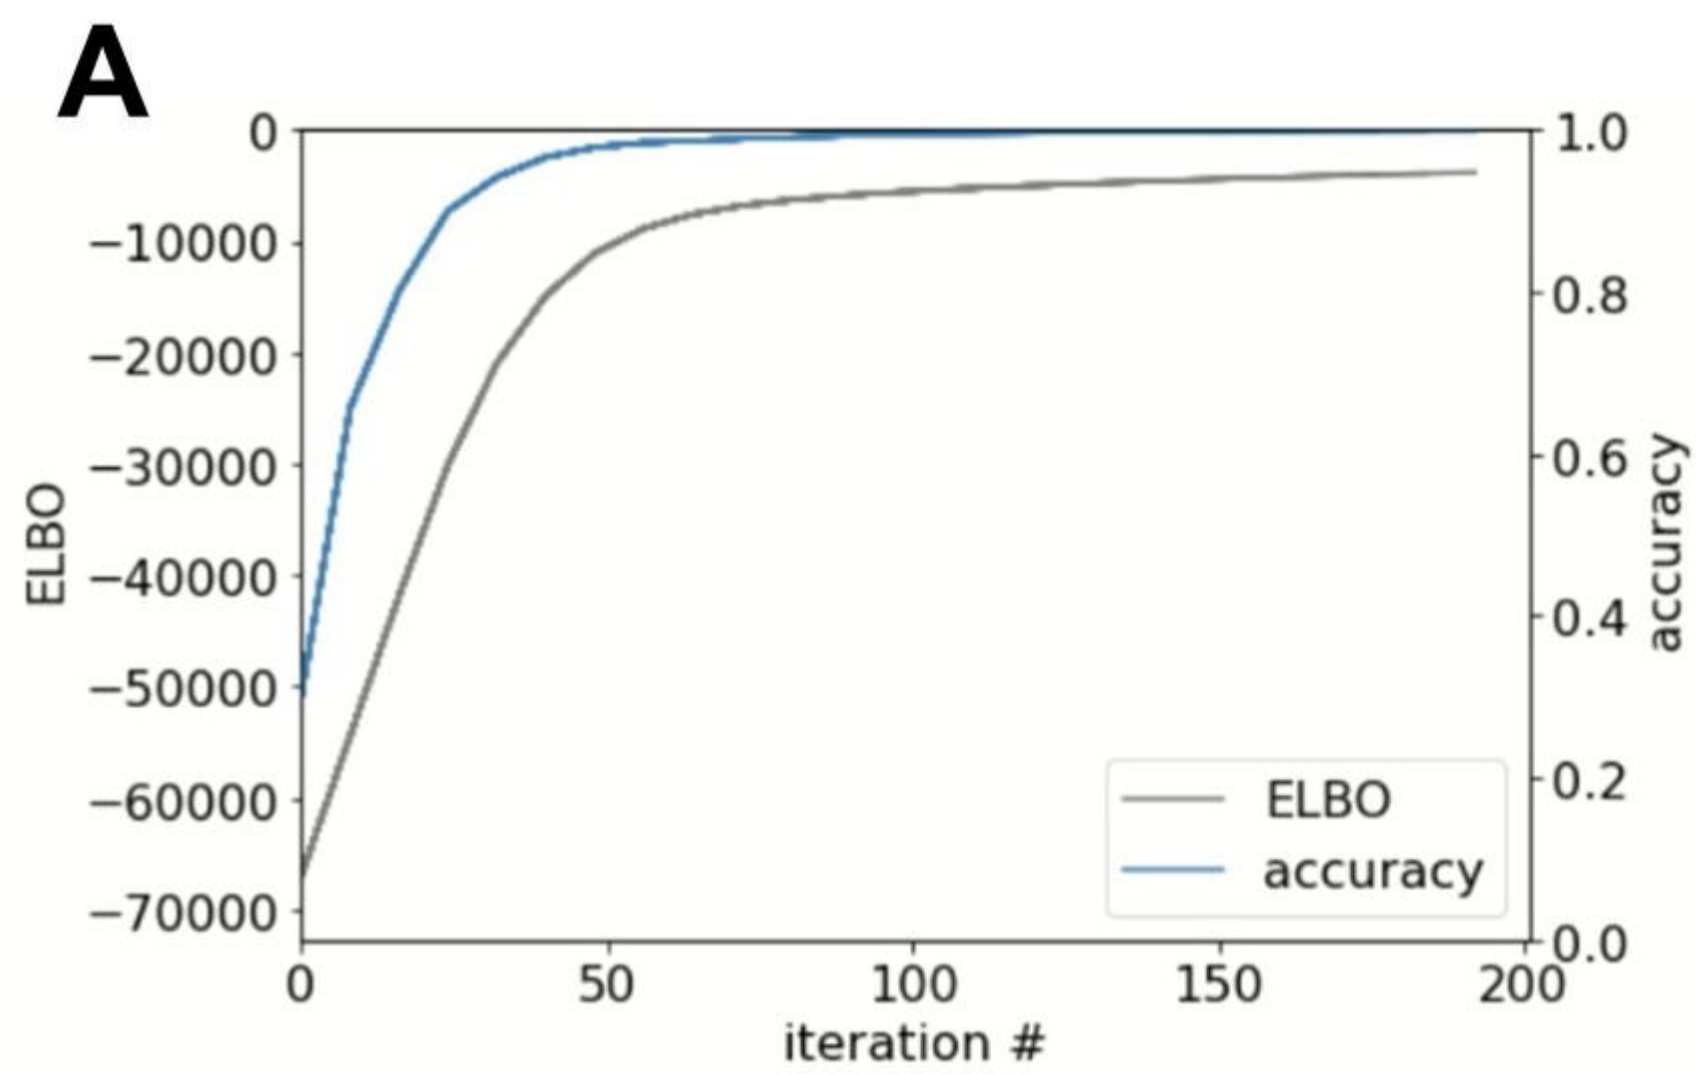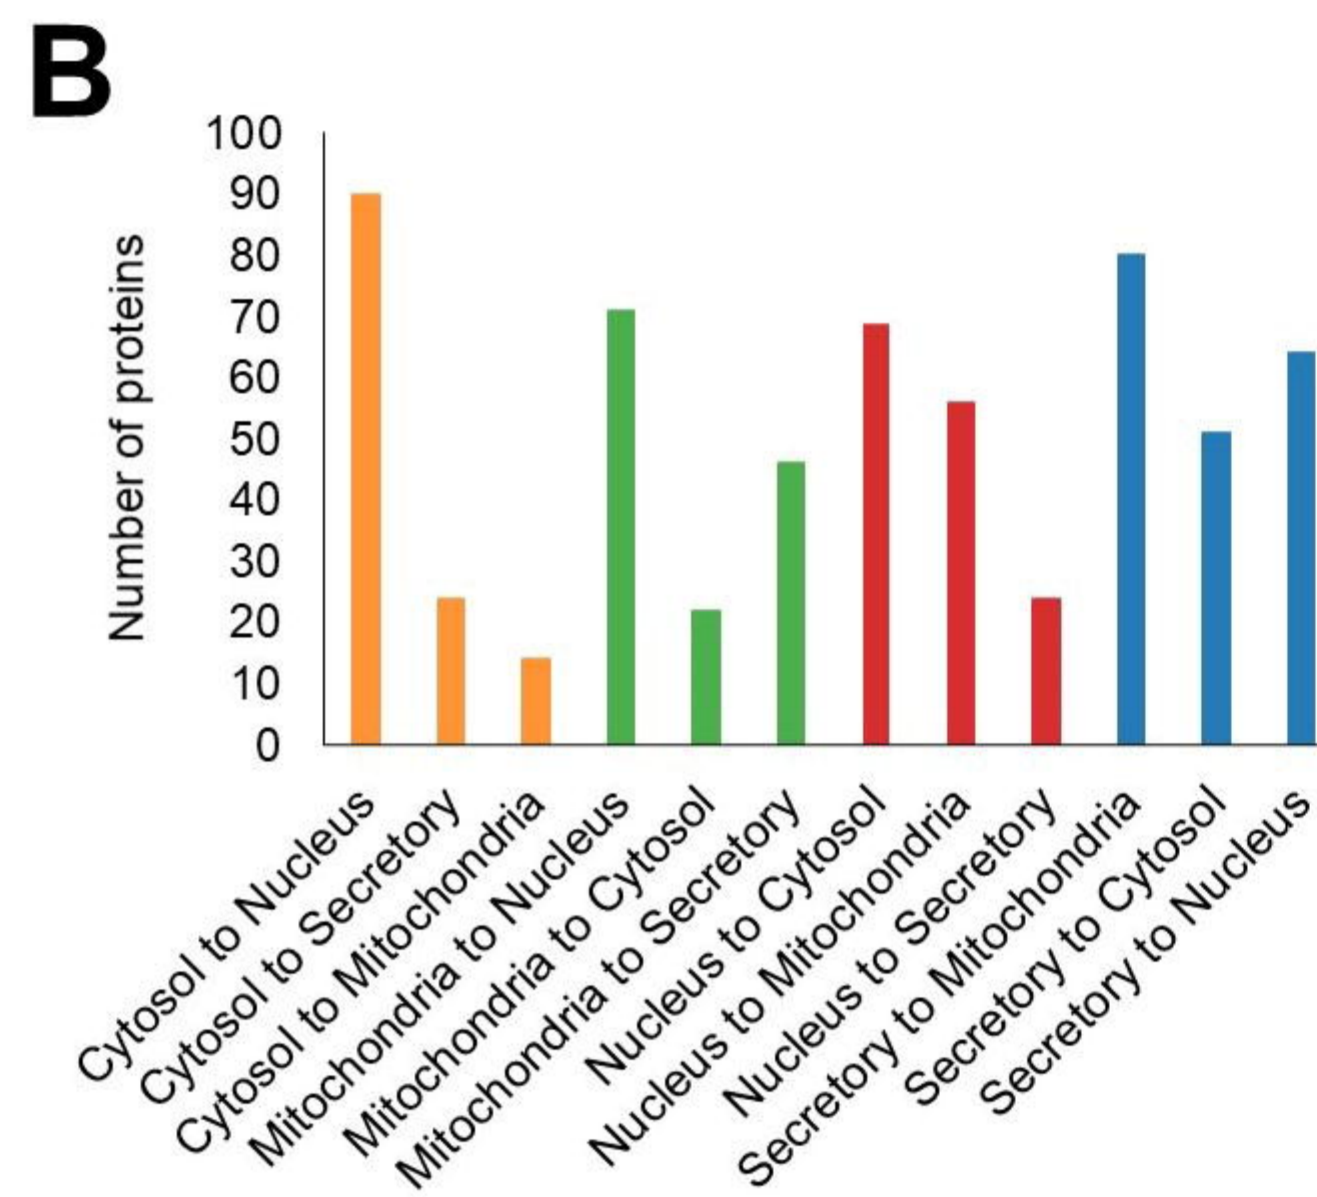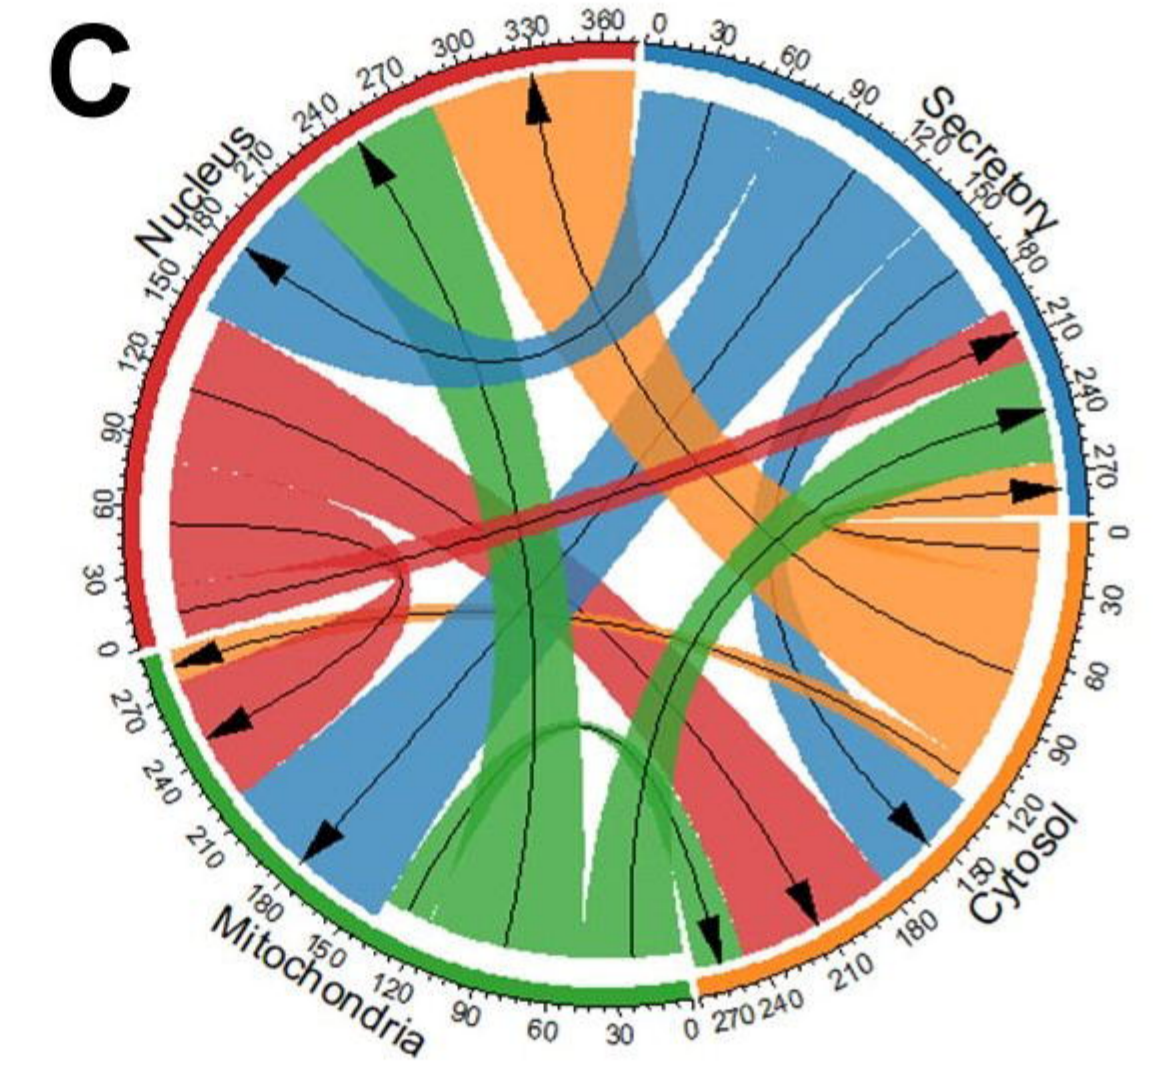

bioRxiv preprint doi: <https://doi.org/10.1101/2021.09.01.458617>; this version posted September 2, 2021. The copyright holder for this preprint (which was not certified by peer review) is the author/funder, who has granted bioRxiv a license to display the preprint in perpetuity. It is made available under aCC-BY-NC-ND 4.0 International license.

**D**

| GO: Biological Process                 | Adj. p-value           |
|----------------------------------------|------------------------|
| Intracellular protein transport        | $4.89 \times 10^{-11}$ |
| Mitochondrial translation termination  | $7.61 \times 10^{-11}$ |
| Mitochondrial translational elongation | $9.16 \times 10^{-13}$ |
| Cellular protein localization          | $3.64 \times 10^{-8}$  |
| Organelle organization                 | $1.47 \times 10^{-8}$  |

  

| GO: Cellular Compartment      | Adj. p-value           |
|-------------------------------|------------------------|
| Mitochondrial matrix          | $2.02 \times 10^{-15}$ |
| Mitochondrial membrane        | $9.19 \times 10^{-14}$ |
| Mitochondrial inner membrane  | $1.45 \times 10^{-13}$ |
| Organelle inner membrane      | $3.74 \times 10^{-12}$ |
| Intracellular organelle lumen | $1.22 \times 10^{-10}$ |

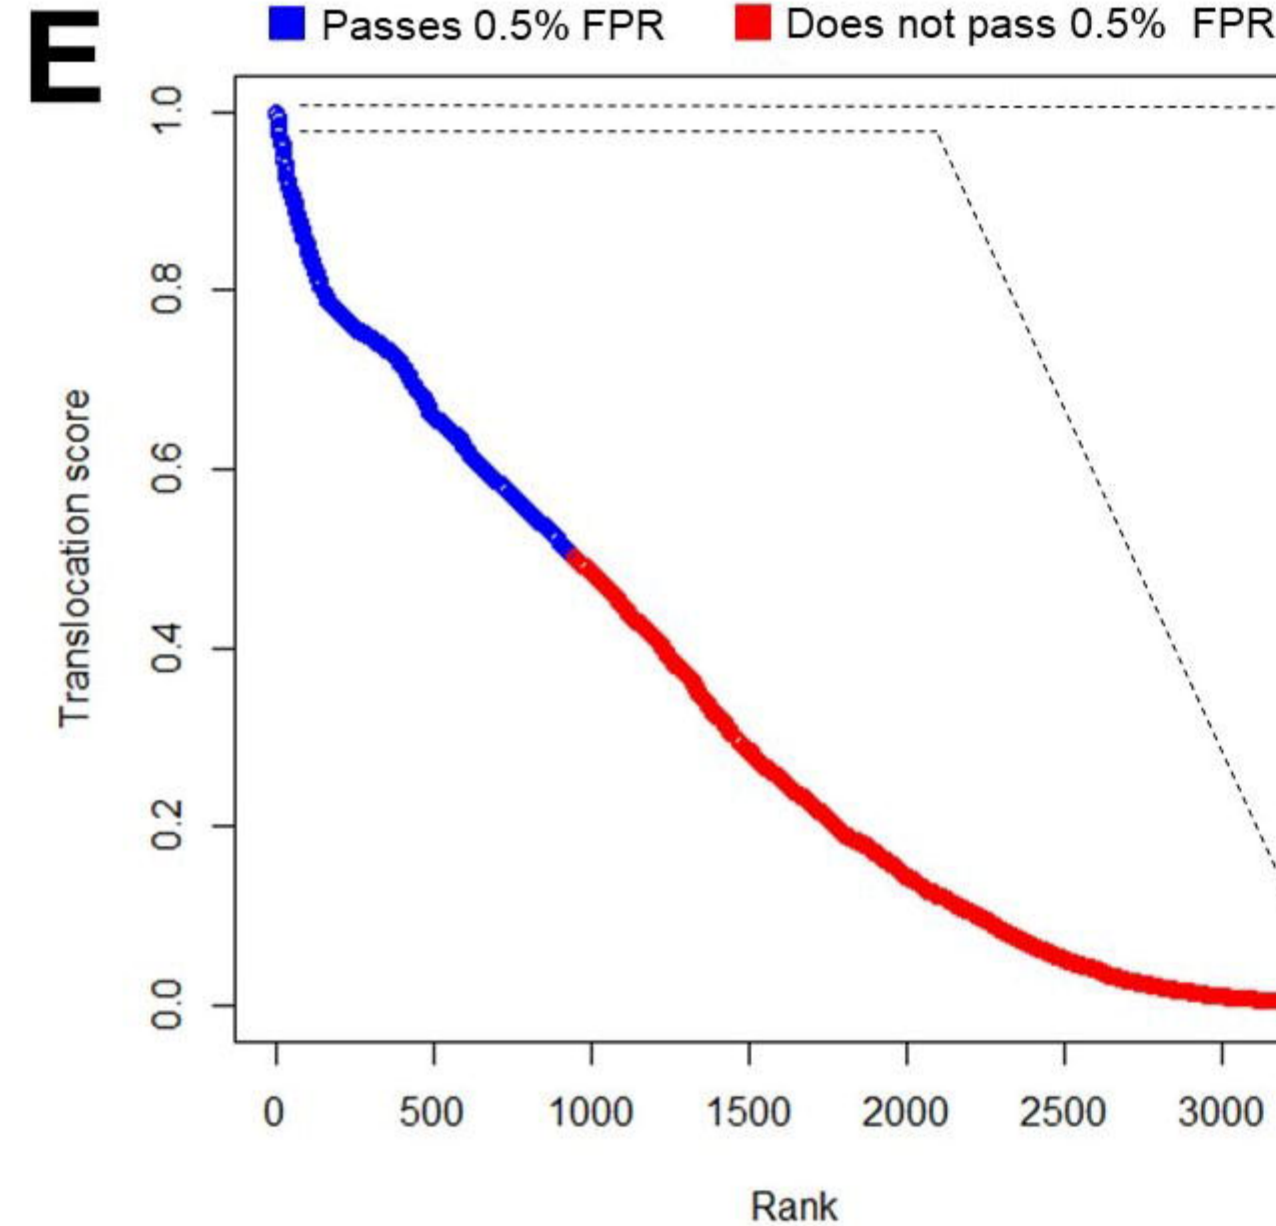

**TOP 12**

|                |                                                            |
|----------------|------------------------------------------------------------|
| <b>MAP2K3</b>  | Dual specificity mitogen-activated protein kinase kinase 3 |
| <b>ATL2</b>    | Atlastin-2                                                 |
| <b>CLDN7</b>   | Claudin-7                                                  |
| <b>PARP4</b>   | Protein mono-ADP-ribosyltransferase PARP4                  |
| <b>OAS1</b>    | Serine/threonine-protein kinase OSR1                       |
| <b>YTHDF2</b>  | YTH domain-containing family protein 2                     |
| <b>PIGK</b>    | GPI-anchor transamidase                                    |
| <b>RPS6KA4</b> | Ribosomal protein S6 kinase alpha-4                        |
| <b>DPYSL3</b>  | Dihydropyrimidinase-related protein 3                      |
| <b>P4HA1</b>   | Prolyl 4-hydroxylase subunit alpha-1                       |
| <b>RNF114</b>  | E3 ubiquitin-protein ligase RNF114                         |
| <b>APOL2</b>   | Apolipoprotein L2                                          |

### Fig. 3. Prediction of UVA-induced translocations in HaCaT cells.

(A) Accuracy and Evidence Lower Bounds (ELBO) obtained for the classifier during training. (B) Number of proteins of each translocation class assigned by the algorithm. (C) Circular plot representing UVA-induced translocations between subcellular niches as identified by the classifier. (D) Enrichment analysis of the translocation targets based on Gene Ontology terms. (E) Rank order plot of the translocation scores obtained for each protein by the machine learning modeling. The top 12 highest scoring proteins are highlighted in a table to the right of the rank order plot.

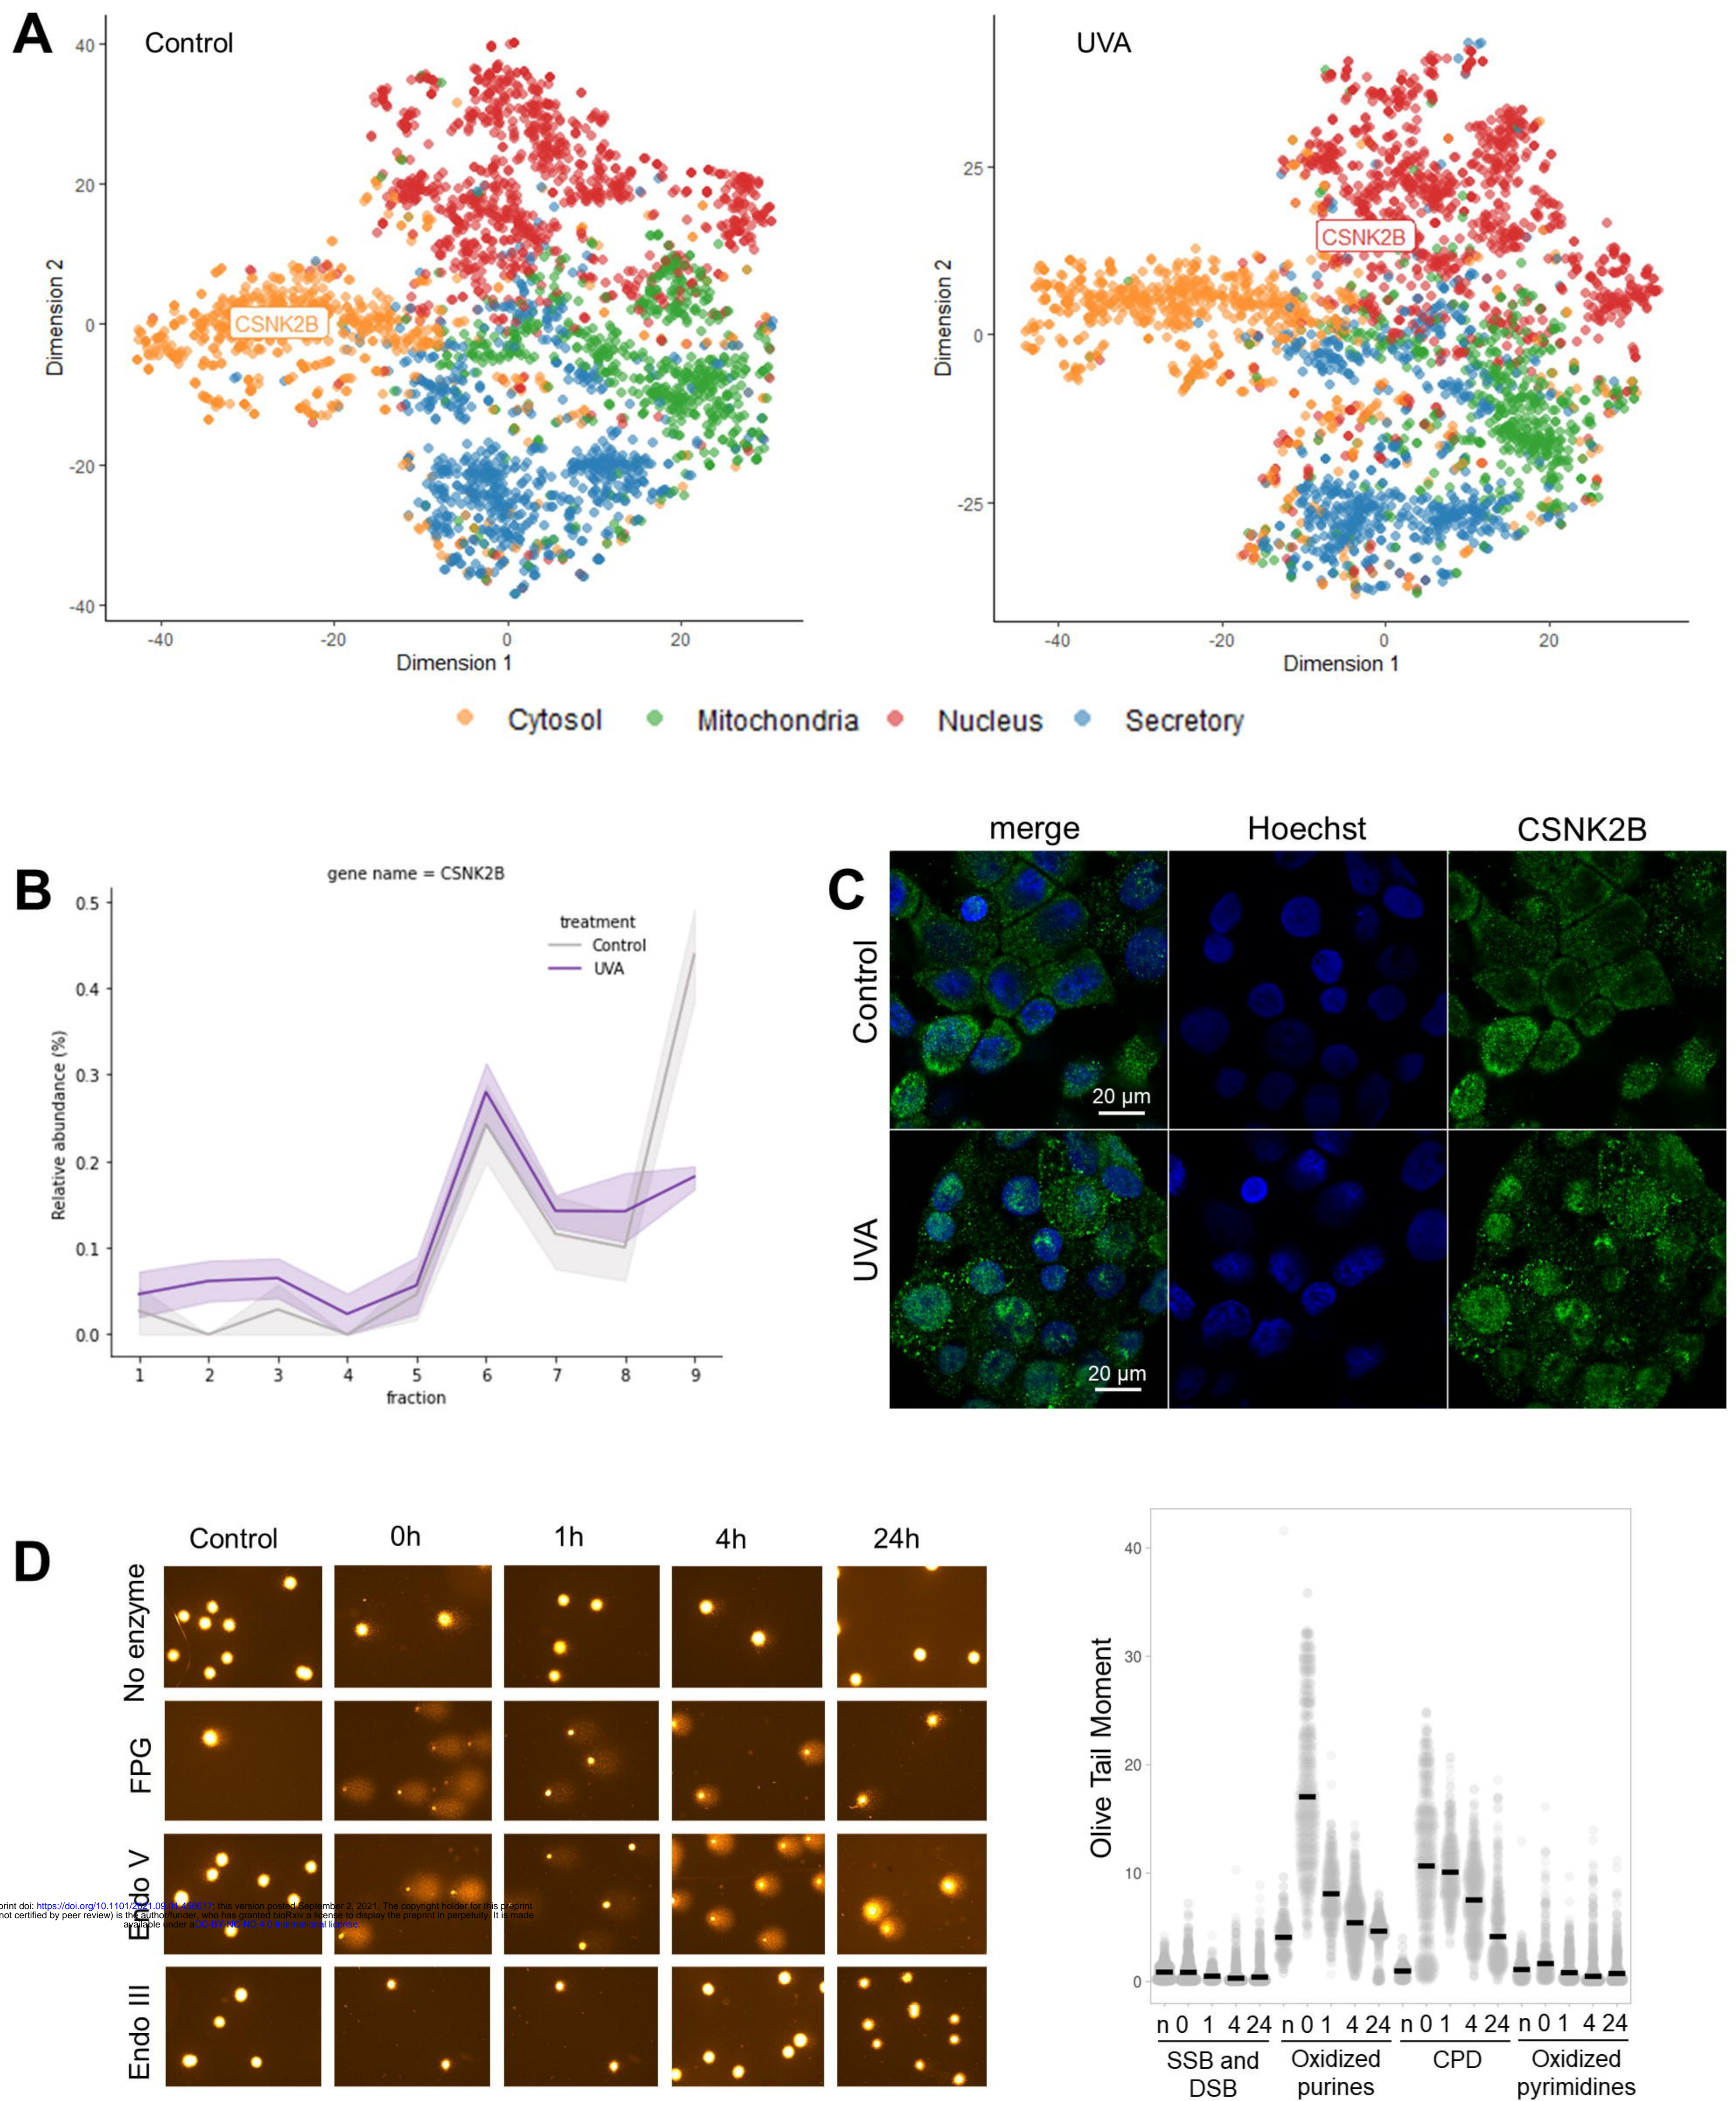

**Fig. 4. CSNK2B translocates to the nucleus upon DNA damage induced by UVA exposure.**

(A) 2D t-SNE plots representing the migration of CSNK2B from the cytosolic cluster in control samples to the nuclear cluster in UVA-irradiated cells. Colors represent the translocations predicted by the classifier (organelle of origin in controls and destination in UVA plot). (B) Profile plot obtained for CSNK2B in controls and irradiated samples. Lines represent the means of relative abundance, and shadowed intervals represent the standard errors. (C) Representative immunofluorescence images showing CSNK2B translocation from the cytosol to the nucleus after exposing HaCaT cells to UVA light. CSNK2B was immunostained (green), and the nucleus was stained with Hoechst (blue). Three independent replicates per group were analyzed. (D) Comet assay results for control and irradiated cells. Representative images of randomly scored comets in slides from all conditions are represented on the left. The graph shows the semi-quantification of each type of DNA damage over time. Points represent Olive Tail Moments scored for all measured cells, and black bars represent the medians of all points (n = 4 independent experiments).

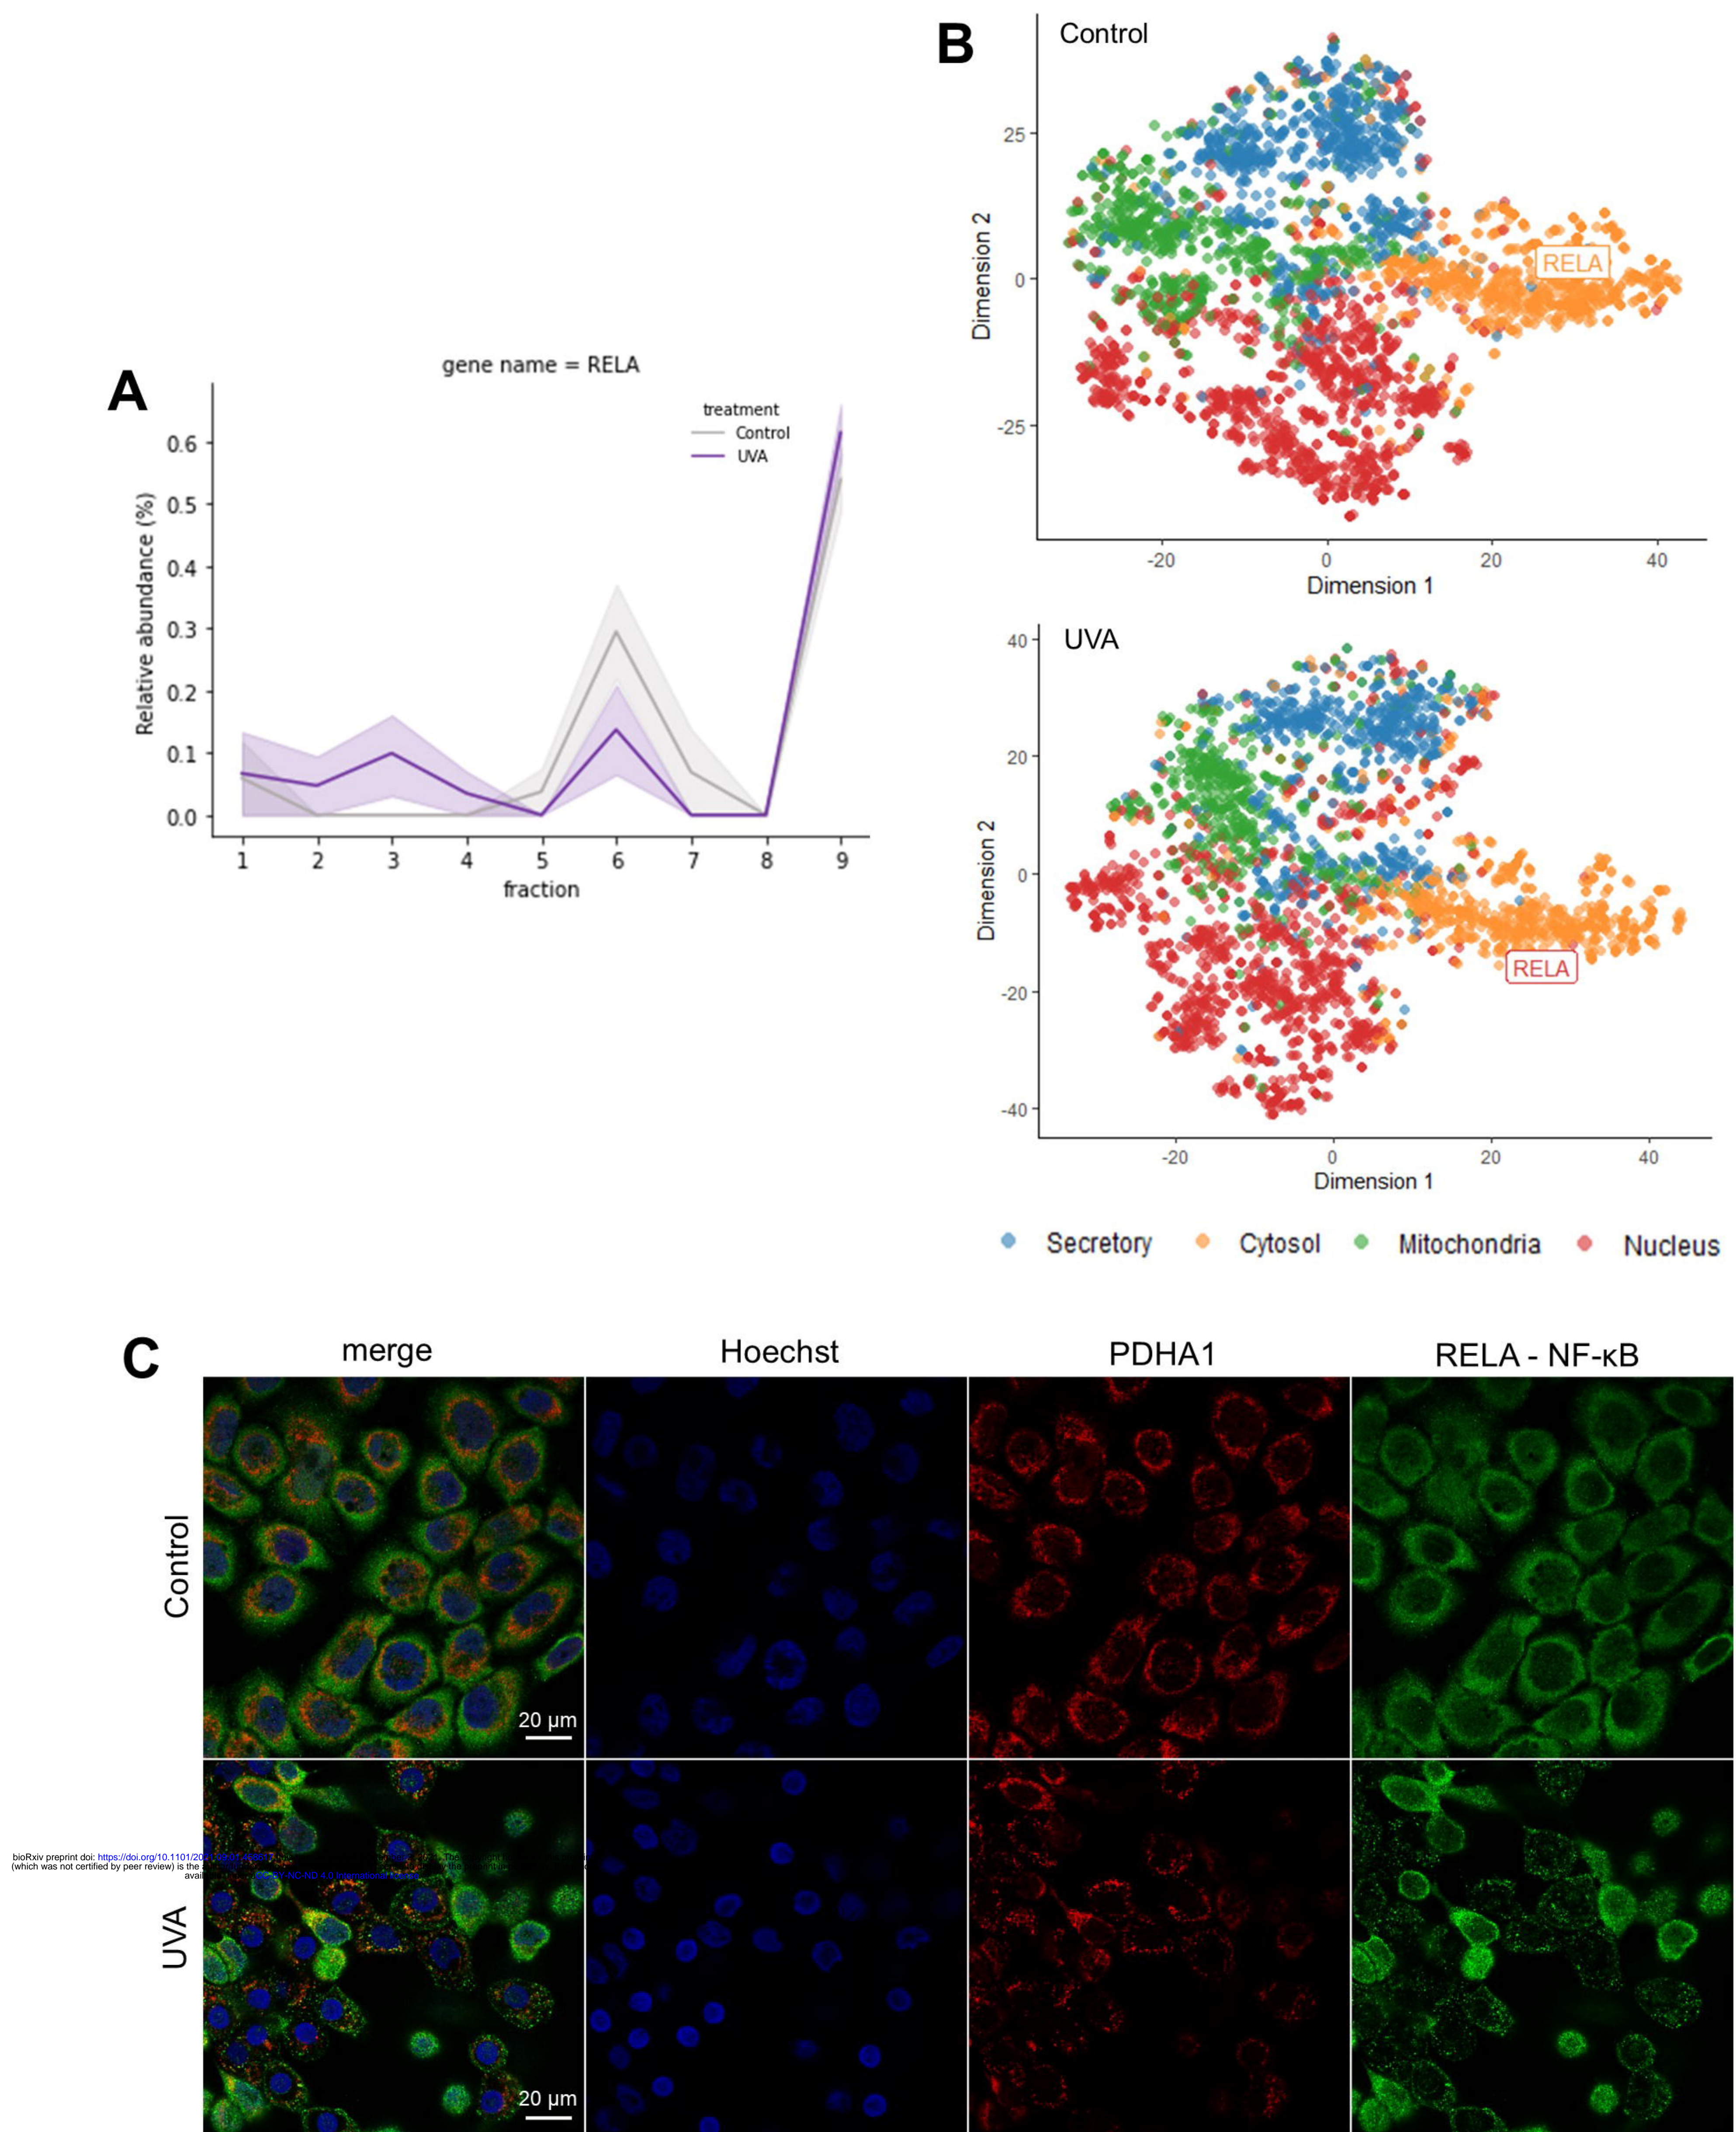

**Fig. 5. UVA light induces NF- $\kappa$ B RELA subunit degradation.**

(A) Profile plots obtained for RELA in controls and irradiated samples. Lines represent the means of relative abundance, and shadowed intervals represent the standard errors. (B) 2D t-SNE plots representing the migration of RELA from the cytosolic cluster in control samples to the interface between the cytosolic and nuclear clusters in UVA-irradiated cells. Colors represent the translocations predicted by the classifier (organelle of origin in controls and destination in UVA plot). (C) Immunostaining of NF- $\kappa$ B RELA subunit (green) in control and UVA-irradiated samples. The nucleus was stained with Hoechst (blue). Mitochondria were stained by immunolabeling of pyruvate dehydrogenase (PDHA1, red). n = 3 independent biological replicates.



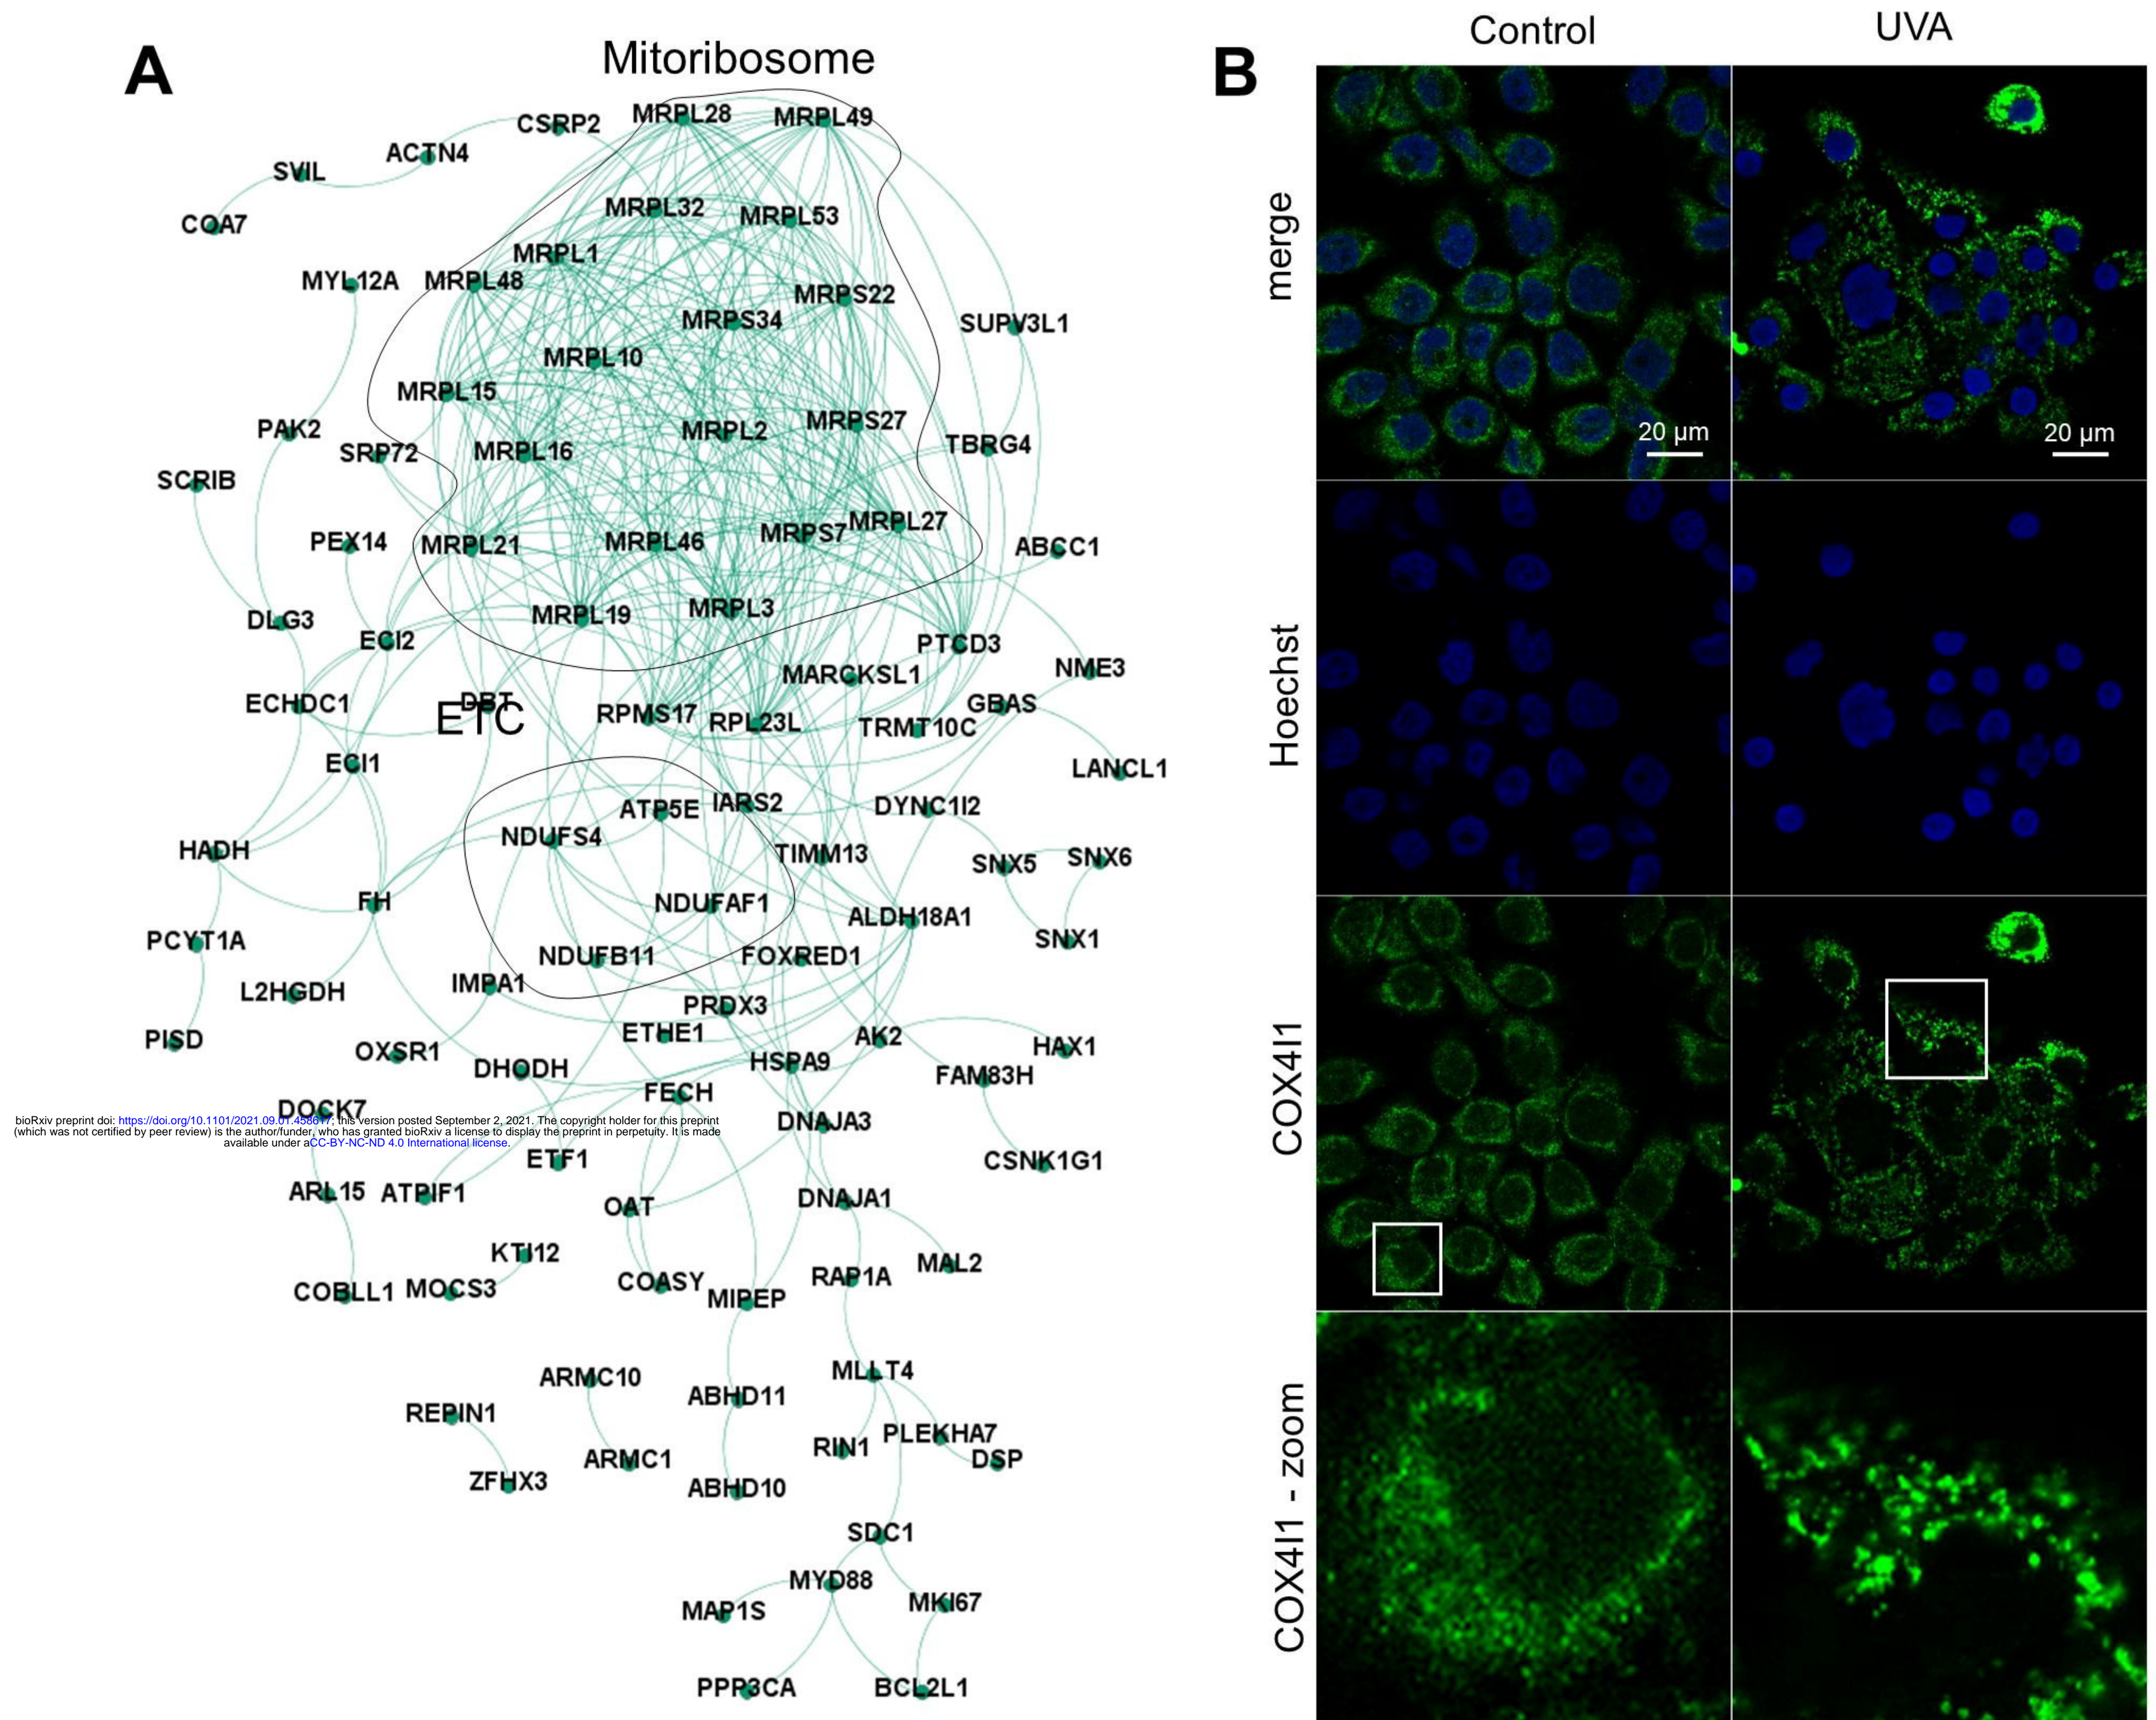

**Fig. 6. UVA induces changes in mitochondrial morphology that are associated with changes in protein fractionation.**

(A) String network of proteins that the learning classifier identified as translocating from the mitochondria to other compartments in response to UVA. Nodes represent proteins, and the edges represent physical interactions between proteins. (B) Immunostaining of COX4I1 (green). The nucleus was stained with Hoechst (blue). Two biologically independent experiments were performed, with similar results obtained.

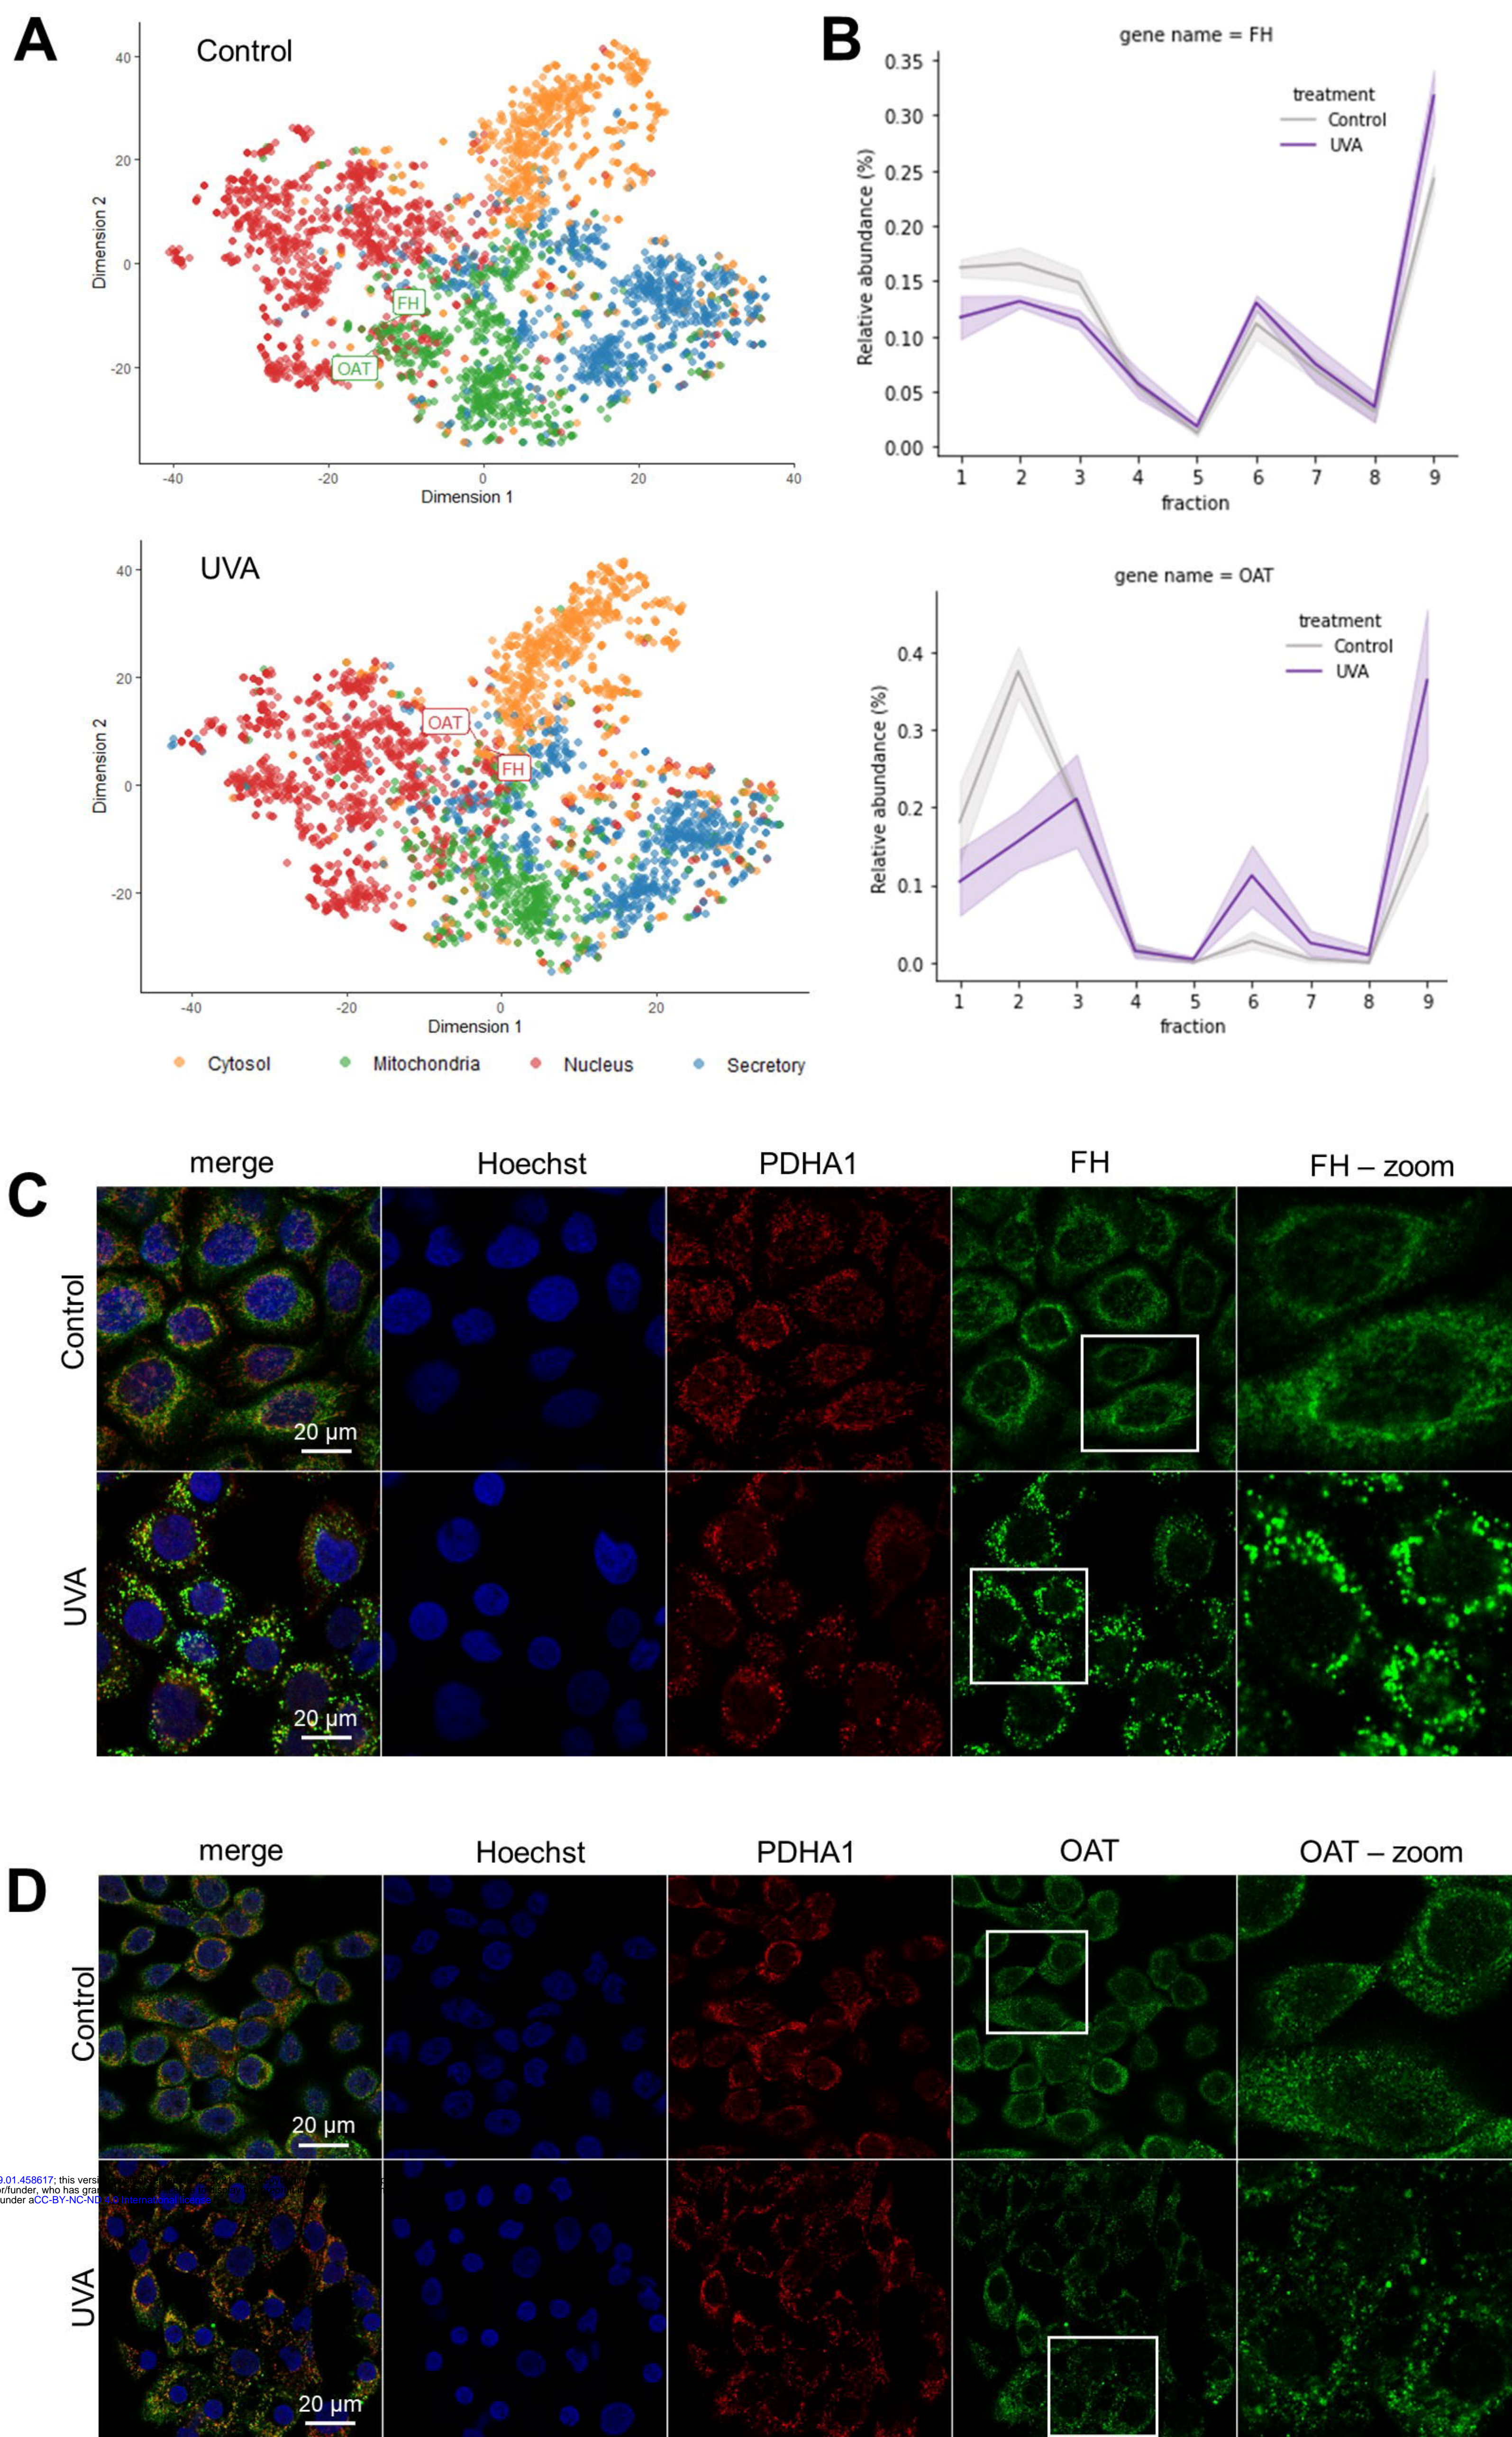

**Fig. 7. Changes in the fractionation profiling of proteins from the mitochondrial matrix in UVA-exposed cells compared to controls reflect mitochondrial fragmentation.**

(A) t-SNE plots representing the migration of FH and OAT from the mitochondrial cluster in control samples to the nuclear cluster in UVA-irradiated cells. Colors represent the translocations predicted by the classifier (organelle of origin in controls and destination in UVA plot). (B) Profile plots obtained for FH and OAT in control and irradiated samples. Lines represent the means of relative abundance, and shadowed intervals represent standard errors. (C) Immunostaining of FH (green) in HaCaT cells exposed to UVA or mock-treated. PDHA1 (red) was immunolabeled as a structural mitochondrial marker. The nucleus was stained with Hoechst (blue). Three independent experiments were performed, and similar results were obtained. (D) Immunostaining of OAT (green) in HaCaT cells exposed to UVA or mock-treated. Similarly, PDHA1 (red) was used as a mitochondrial marker, and the nucleus was stained with Hoechst (blue). Three independent experiments were performed, and similar results were obtained.

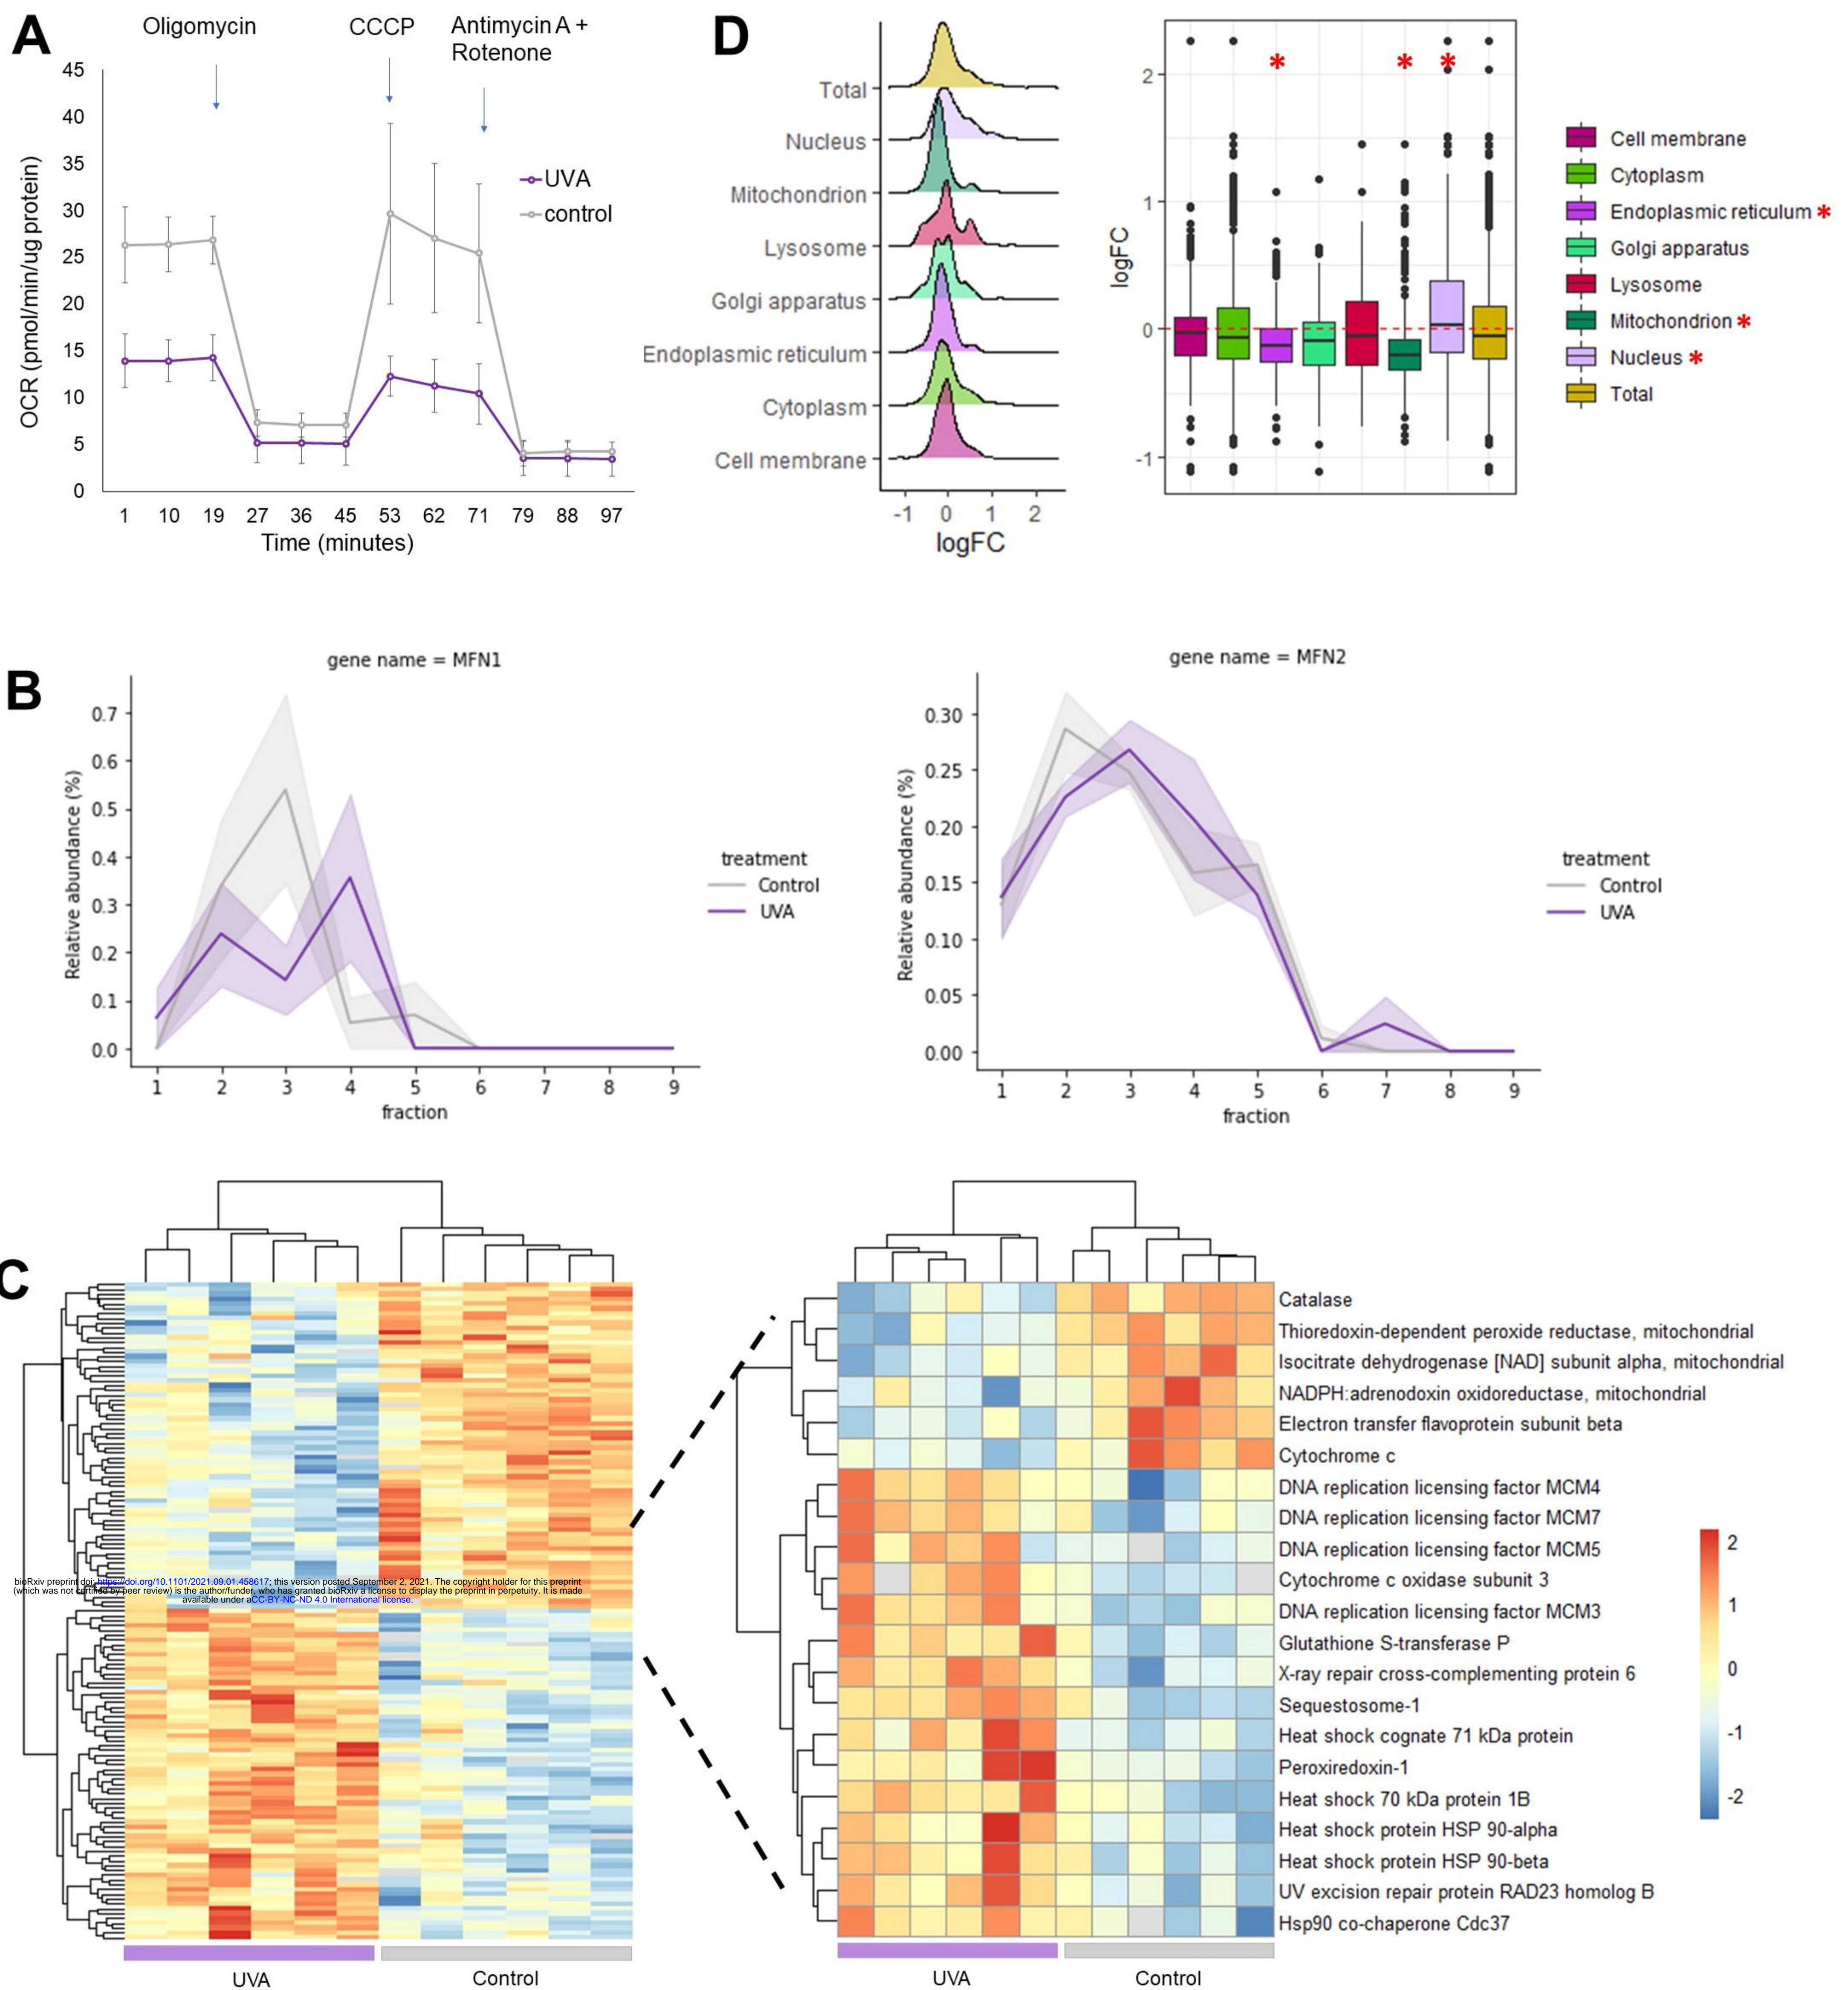

**Fig. 8: UVA-induced changes in mitochondrial dynamics impact respiratory function.**

(A) Oxygen consumption rates (OCR) were measured in irradiated and control cells before and after the addition of 1  $\mu$ M oligomycin, 1  $\mu$ M CCCP and a solution containing 1  $\mu$ M antimycin and 1  $\mu$ M rotenone (n = 4). (B) Profile plots of MFN1 and MFN2. Lines represent the means of relative abundance, and shadowed intervals represent the standard errors. (C) Hierarchical clustering of differentially regulated proteins comparing HaCaT cells exposed to UVA versus controls (Student's T-test, 0.05 FDR correction). The color gradient represents z-scored LFQ intensities, and columns represent replicates (n = 6 per group). Stress-responsive proteins are highlighted. (D) Compartment-specific proteome changes in irradiated versus control HaCaT cells one and a half hours after UVA exposure (n = 6). Values are expressed in  $\log_2$  (Fold Change UVA/control).
